1 **Mapping the molecular and structural specialization of the skin basement**  
2 **membrane for inter-tissue interactions**

3

4 Ko Tsutsui<sup>1</sup>, Hiroki Machida<sup>1,2,3</sup>, Ritsuko Morita<sup>1</sup>, Asako Nakagawa<sup>1</sup>, Kiyotoshi  
5 Sekiguchi<sup>4</sup>, Jeffrey H. Miner<sup>5</sup>, Hironobu Fujiwara<sup>1,2,3,\*</sup>

6

7 <sup>1</sup>Laboratory for Tissue Microenvironment, RIKEN Center for Biosystems Dynamics  
8 Research (BDR), Kobe 650-0047, Japan

9 <sup>2</sup>Graduate School of Science and Technology, Kwansai Gakuin University, Sanda 669-  
10 1337, Japan

11 <sup>3</sup>Graduate School of Medicine, Osaka University, Suita 565-0871, Japan

12 <sup>4</sup>Laboratory of Matrixome Research and Application, Institute for Protein Research,  
13 Osaka University, Suita 565-0871, Japan

14 <sup>5</sup>Division of Nephrology, Department of Medicine, Washington University School of  
15 Medicine, St. Louis 63110, USA

16

17

18 \*Correspondence: [hironobu.fujiwara@riken.jp](mailto:hironobu.fujiwara@riken.jp)

19

20

21 **Abstract**

22 Inter-tissue interaction is fundamental to multicellularity. Although the basement  
23 membrane (BM) is located at tissue interfaces, its mode of action in inter-tissue  
24 interactions remains poorly understood, mainly because the molecular and structural  
25 details of the BM at distinct inter-tissue interfaces remain unclear. By combining  
26 quantitative transcriptomics and immunohistochemistry, we systematically identify the  
27 cellular origin, molecular identity and tissue distribution of extracellular matrix molecules  
28 in mouse hair follicles, and reveal that BM composition and architecture are exquisitely  
29 specialized for distinct inter-tissue interactions, including epidermal–fibroblast,  
30 epidermal–muscle and epidermal–nerve interactions. The epidermal–fibroblast interface,  
31 namely, hair germ–dermal papilla interface, makes asymmetrically organized side-  
32 specific heterogeneity in BM, defined by the newly characterized interface, hook and  
33 mesh BMs. One component of these BMs, laminin  $\alpha 5$ , is required for the topological and  
34 functional integrity of hair germ–dermal papilla interactions. Our study highlights the  
35 significance of BM heterogeneity in distinct inter-tissue interactions.

## 36 **Introduction**

37 The extracellular matrix (ECM) is a complex noncellular network of multicellular  
38 organisms that plays essential roles in animal development and homeostasis. The  
39 basement membrane (BM) is a thin sheet-like ECM that is located at the border of  
40 tissues, where it serves to compartmentalize and also tightly integrate tissues<sup>1, 2</sup>. The  
41 BM has several crucial roles: i) it provides structural support to cells that is essential for  
42 the development of organ structures; ii) it signals to cells through adhesion receptors  
43 such as integrins; iii) it controls the tissue distributions and activities of soluble growth  
44 factors; and iv) its mechanical characteristics influence cell behavior<sup>3, 4, 5</sup>. Thus, the  
45 composition and structure of the BM play critical roles in cell proliferation,  
46 differentiation, migration, survival, polarity and positioning, underpinning many  
47 fundamental biological phenomena, including the developmental patterning, inter-tissue  
48 interactions and stem cell niche formation.

49 The BM is composed of a large variety of molecules that exhibit  
50 spatiotemporal expression patterns during development and homeostasis, indicating that  
51 individual cell types are exposed to tailor-made BM niches<sup>6, 7, 8</sup>. In mammals, the entire  
52 set of ECM molecules, called the matrixome or matrisome, is encoded by  
53 approximately 300 ECM genes and there are also approximately 800 ECM-associated  
54 genes, such as those encoding ECM-modifying enzymes and growth factors<sup>7, 9</sup>  
55 (<http://matrisomeproject.mit.edu/>). Although information about the unique distribution,  
56 biochemical activities and *in vivo* functions of individual BM molecules has been  
57 accumulated, the entire molecular landscape of the BM composition, including its  
58 cellular origins, tissue localizations and pattern-forming processes, in all organs remains  
59 largely unknown. One major reason for the difficulty in obtaining a comprehensive

60 understanding of the ECM's composition lies in the biochemical properties of ECM  
61 proteins, including their large size, insolubility and crosslinked nature. These properties  
62 have made it challenging to systematically characterize ECM specialization in its  
63 entirety at the cellular resolution in tissues. This lack of knowledge impedes our  
64 understanding of the extrinsic regulation of cellular behaviour and interactions.

65 Mouse hair follicle (HF) is an excellent model to investigate the formation and  
66 function of spatiotemporally specialized ECMs because this mini-organ is tiny, yet has  
67 clear epidermal and dermal compartments that are associated with specific tissue  
68 architecture and functions (Fig. 1a)<sup>10, 11</sup>. Different types of epidermal stem cells are  
69 compartmentalized along the longitudinal axis of the HF and attach to the BM. These  
70 different epidermal stem cells are associated with distinct dermal cells, such as the  
71 lanceolate mechanosensory complexes in the upper bulge for touch sensation and  
72 epidermal stem cell regulation<sup>12, 13, 14</sup>, arrector pili muscle in the mid-bulge for  
73 piloerection<sup>15</sup>, and the dermal papilla (DP) in the hair germ (HG) for HF development  
74 and regeneration<sup>16</sup>. These epidermal–dermal interactions take place via the BM.

75 Previous studies suggested that the BM is an important niche component for  
76 both epidermal stem cells and dermal cells. Loss of contact with the ECM or reduced  
77 integrin expression triggers the differentiation of cultured epidermal stem cells<sup>17</sup>.  
78 Deletion of the transmembrane protein collagen XVII (COL17), cytoplasmic integrin-  
79 linked kinase (ILK) or kindlin, which mediate the linkage between the epidermis and  
80 BM, resulted in defects in epidermal tissue regulation<sup>18, 19, 20, 21, 22</sup>. In addition, previous  
81 analyses showed differences in the expression of ECM genes between distinct  
82 subpopulations of epidermal stem cells<sup>12, 15, 23</sup>. These different ECM components may  
83 serve to anchor specific stem cells in the niche, and may also play a role in

84 communication between epidermal stem cells and adjacent dermal cell populations.  
85 Indeed, BM proteins derived from certain epidermal stem cell populations provide a  
86 niche for the development and functions of arrector pili muscles and mechanosensory  
87 nerve complexes<sup>12, 15</sup>. Thus, it is likely that both the epidermal and the dermal surfaces  
88 of the BM are molecularly and structurally tailored to mediate distinct inter-tissue  
89 interactions.

90 Here, we systematically identified the cellular origins, molecular identities and  
91 tissue distribution patterns of ECMs in the mouse HF at high spatial resolution in a  
92 semi-quantitative manner. Our study provides the first comprehensive overview of the  
93 ECM landscape within the adult HF and highlights how BM composition and structure  
94 are exquisitely tailored for individual inter-tissue interactions. Our study further  
95 revealed a remarkable degree of molecular complexity and spatial specialization of BMs  
96 in the HG–DP interface, which is involved in the structural and functional integrity of  
97 the HG–DP inter-tissue interactions.

98 **Results**

99 **Global ECM gene expression profiling in adult mouse hair follicles**

100 Deeper sequencing is required to obtain comprehensive genome-wide ECM gene  
101 expression profiles, including that of low-abundance genes. Thus, we pooled different  
102 epidermal and dermal cell populations from adult telogen dorsal skin using cell sorting.  
103 We used our recently established epidermal cell isolation protocol to purify basal  
104 epidermal stem/progenitor cells (integrin  $\alpha 6^+$ ) resident in the lower isthmus (*Lgr6*<sup>+</sup>),  
105 upper bulge (*Gli1*<sup>+</sup>), mid-bulge (CD34<sup>+</sup>), HG (*Cdh3*<sup>+</sup>) and unfractionated basal  
106 epidermal stem/progenitor cells (basal; mostly from the interfollicular epidermis) by  
107 utilizing *Lgr6-GFP-ires-CreERT2*, *Gli1-eGFP*, *Cdh3-eGFP* and wild-type mice (Fig.  
108 1a–e, Supplementary Fig. 1a–e)<sup>12</sup>. Two dermal cell populations, DP cells  
109 (*Lef1*<sup>+</sup>/*Pdgfra*<sup>+</sup>) and pan-dermal fibroblasts (*Pdgfra*<sup>+</sup>), were also isolated from *Lef1*-  
110 *eGFP* and *Pdgfra-H2B-eGFP* mice (Fig. 1f, g, Supplementary Fig. 1f–l). The purity of  
111 the sorted cells was verified by qRT-PCR on the HF region-specific genes<sup>12</sup> (Fig. 1h).  
112 Then, RNA-seq of each isolated population was performed. Spearman’s rank correlation  
113 coefficient analysis and principal component analysis (PCA) with all of the expressed  
114 genes showed that all biological replicates clustered together and were significantly  
115 different from other samples (Supplementary Fig. 1m, n).

116 To investigate global differences in ECM gene expression levels in each cell  
117 population, we examined the FPKM values of all 281 annotated ECM genes, called the  
118 ‘matrisome’ (see Methods), in distinct cell populations<sup>6</sup>. Although the median FPKM of  
119 all genes in each cell population were around 1, those of the matrisome tended to  
120 increase from basal (median FPKM ~0.115) to HG populations (median FPKM ~0.958)  
121 (Fig. 1i). The median FPKM values of the matrisome in DP cells and dermal fibroblasts

122 were ~2.14 and ~4.88, respectively, reflecting their roles in the production and  
 123 maintenance of abundant interstitial ECM proteins. The diversity of the expressed ECM

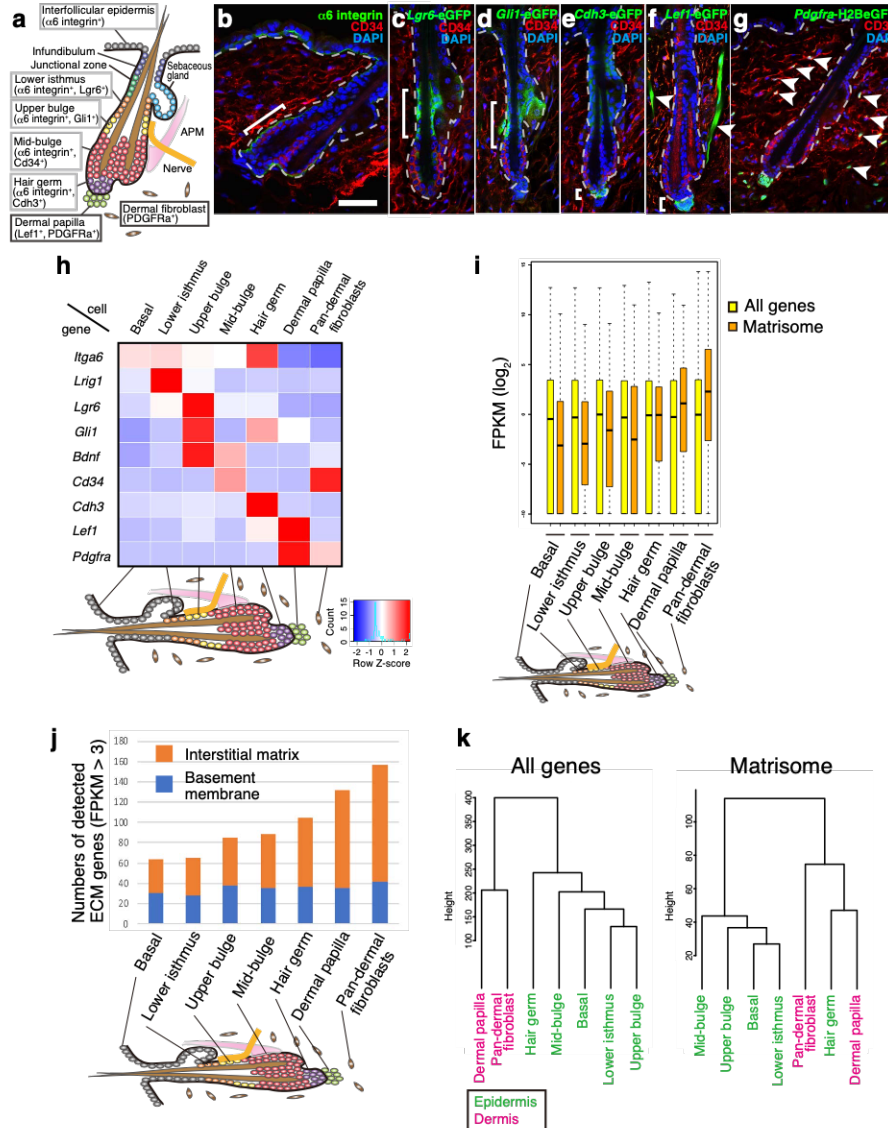

**Fig. 1** Targeted cell isolation and transcriptional profiling of the mouse hair follicle. **a** Graphical illustration of adult telogen HF compartments. Grey and black frames indicate epidermal and dermal compartments targeted in this study, respectively. APM, arrector pili muscle. **b–g** Tissue distribution of the markers for each HF compartment. Brackets indicate the target cell compartment in each panel. HF mid-bulge basal stem cells were labelled with  $\alpha 6$  integrin (green) and CD34 (red) (b). Lower isthmus epidermal basal stem cells were visualized by *Lgr6*-eGFP (green) (c). Upper bulge epidermal basal stem cells were visualized by *Gli1*-eGFP (green) (d). HG cells were visualized by *Cdh3*-eGFP (green) (e). DP cells and arrector pili muscles (arrowheads) were visualized by *Lef1*-eGFP (green) (f). Dermal fibroblasts (arrowheads), including DP cells, were visualized by *Pdgfra*-H2BeGFP (green) (g). White dashed lines indicate epidermal–dermal borders. Scale bar, 50  $\mu$ m. **h** Relative mRNA expression levels of HF region-specific genes in different sorted cell populations. mRNA levels are expressed relative to *Gapdh* and represented by Z-score values. **i** Expression levels of all genes and matrisome genes in different HF cell populations. Data are median FPKM ( $\log_2$ ) with first to third quartile box and dashed line ranging from the minimum to the maximum.  $n=3$  (HG and DP) or 4 (other populations). **j** Number of ECM genes detected in different HF cell populations. Genes with FPKM values greater than 3 were counted. Averaged FPKM values from three or four biological replicates were examined. **k** Global ECM gene expression correlation among HF cell populations examined by hierarchical clustering. Genes with FPKM values greater than 3 were used for the analysis among all genes (left panel) and matrisome genes (right panel). Averaged FPKM values from three or four biological replicates were examined. Green and magenta colours indicate epidermal and dermal compartments, respectively.

124 genes was also increased as cells were localized deeper in the skin (Fig. 1j). The number  
125 of expressed BM genes was constant across the examined populations, while that of  
126 interstitial matrix genes was increased in the deep portion of the HF.

127 The global ECM gene expression correlations among these cell populations  
128 were examined by hierarchical clustering. When all expressed genes were used, the  
129 epidermal and dermal populations were clearly separated (Fig. 1k). Intriguingly,  
130 however, when matrisome genes were used, HG was clustered with DP, but not with  
131 other epidermal cell populations, demonstrating that the ECM expression profile of HG  
132 cells resembles that of DP rather than those of other epidermal populations. This result  
133 also revealed that the ECM profile of DP resembles that of HG cells rather than that of  
134 pan-dermal fibroblasts.

135 Taken together, these results indicate that the matrisome of epidermal basal  
136 stem/progenitor subpopulations gains more complexity for epidermal cells located  
137 deeper in the skin. Given that the HG matrisome shows a particular resemblance to that  
138 of DP, ECM expression profiles of epidermal stem/progenitor compartments may be  
139 coupled with that of the adjacent tissues to cooperatively establish extracellular  
140 microenvironments, or niches, for local inter-tissue interactions.

141

## 142 **Cellular origin of BM and interstitial ECM molecules**

143 It has been generally believed that the epidermal cells are the major source of the  
144 epidermal BM. However, no comprehensive understanding of the cellular origin of BM  
145 components has been obtained. Here, we systematically and quantitatively examined the  
146 expression patterns of 67 BM genes and 214 interstitial matrix genes in the isolated cell  
147 populations (Fig. 2, Supplementary Table 1). Eighteen BM genes (*e.g. Lama1, Lama3,*



148 *Lama5, Col4a3, Col4a4, Col4a5, Col4a6, Col17a1, Egfl6, Fras1, Frem2, Npnt*) were  
 149 exclusively or predominantly expressed in the epidermal stem/progenitor populations

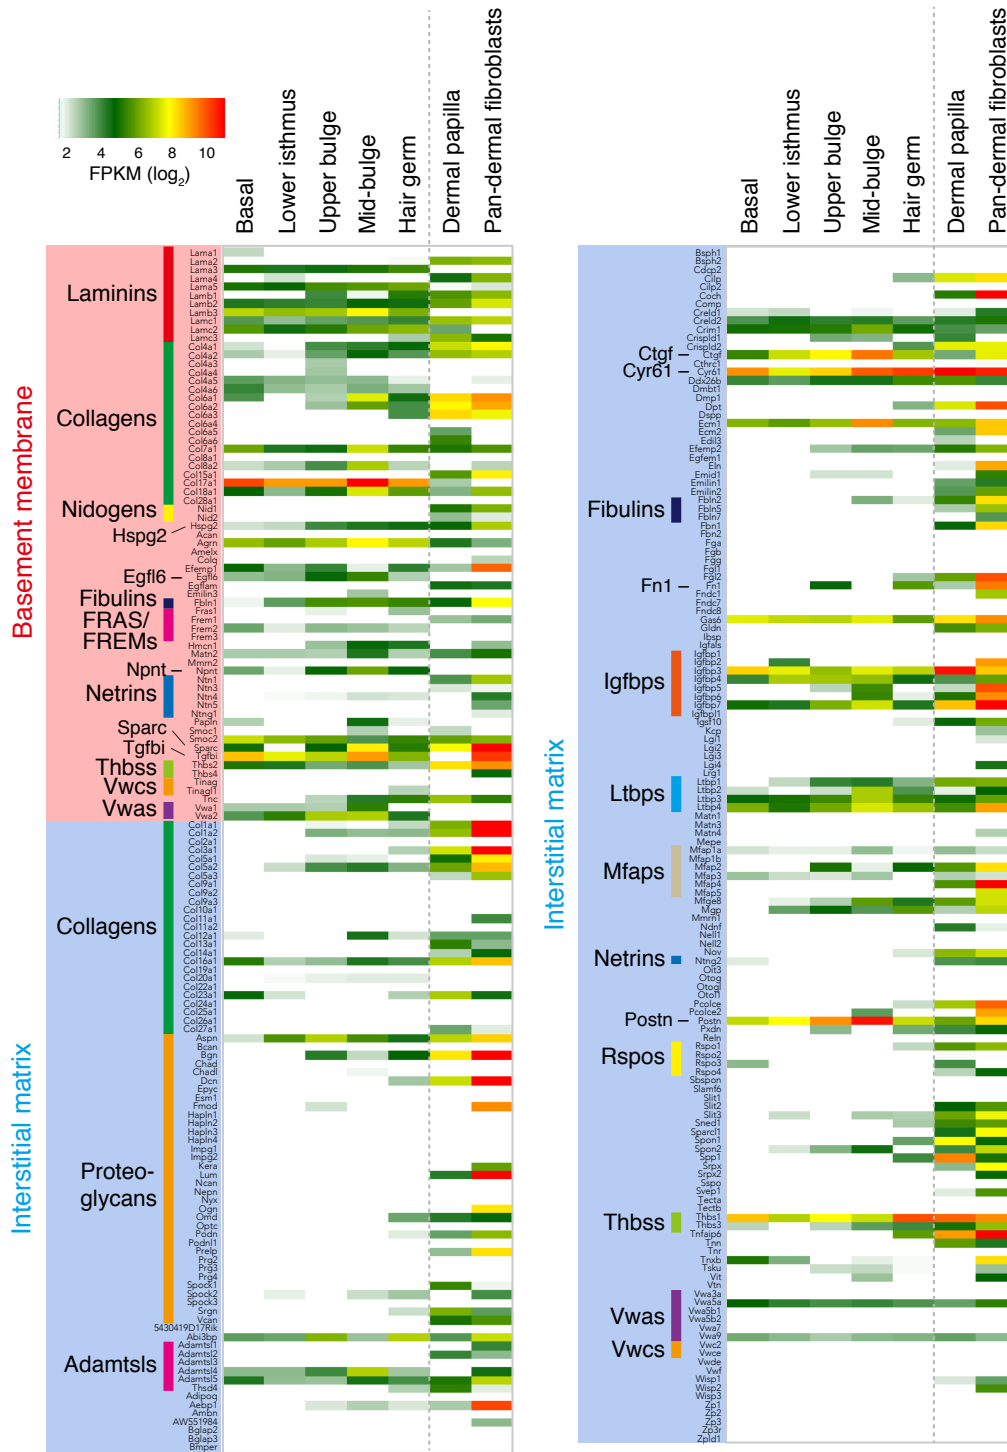

**Fig. 2** Overview of the matrisome gene expression. Heatmap representation of the expression levels of all matrisome genes. Averaged FPKM values (log<sub>2</sub> converted; three or four biological replicates) are indicated according to a heat gradient as shown at the top left corner. Matrisome genes are first categorized into BM components (red zone) and interstitial matrix components (blue zone). Then, they are subdivided according to the ECM families to which they belong. Epidermal and dermal compartments are separated by a dashed line.

150 (Fig. 2, Supplementary Table 2). These genes can be classified into two categories:  
151 those encoding molecules functioning toward the epidermis (*Lama3*, *Lama5*, *Col17a1* –  
152 key molecules for keratinocyte adhesion)<sup>24</sup> and toward the dermis (*Egfl6*, *Fras1*, *Frem2*,  
153 *Npnt* – key molecules for epidermal–dermal interactions)<sup>12, 15, 25</sup>. In contrast, 23 BM  
154 genes (e.g. *Lama2*, *Lama4*, *Lamc3*, *Col4a1*, *Col4a2*, *Col6*, *Col15a1*, *Nid1,2*, *Ntn1–5*)  
155 were exclusively or predominantly expressed in the dermal fibroblast populations. This  
156 group of genes contains core BM genes, *Col4a1*, *Col4a2*, *Nid1* and *Nid2*. Other notable  
157 ECM genes were *Lama2*, *Lama4* and *Col6* isoforms, which mainly function for  
158 mesenchymal cells, such as nerves, muscles and blood vessels<sup>24</sup>. Eighteen BM genes  
159 (e.g. *Lamb2*, *Lamc1*, *Col7a1*, *Col18a1*, *Hspg2*, *Agrn*, *Sparc*, *Tgfb1*, *Tnc*) were expressed  
160 by both compartments. Together, our data indicate that major BM molecules for  
161 keratinocyte adhesion are provided by basal keratinocytes themselves, and that the  
162 dermal fibroblasts are another major source of BM molecules.

163         Interstitial matrix genes were expressed mainly by dermal cell populations  
164 (Fig. 2). Dermal fibroblasts expressed massive amounts of major interstitial structural  
165 ECM molecules such as *Colla1*, *Col3a1*, *Col5a1*, *Col16a1*, *Bgn*, *Dcn*, *Lum*, *Fn1*, *Igf1bp*,  
166 *Postn*, *Spp1* and *Thbs1*. Interstitial proteoglycans were almost exclusively expressed in  
167 dermal fibroblasts. Notably, however, a substantial number of interstitial matrix genes  
168 were also expressed by distinct epidermal cells (e.g. *Aspn*, *Abi3bp*, *Adamtsl4*, *Ctgf*,  
169 *Cyr61*, *Ecm1*, *Gas6*, *Igf1bps*, *Ltbps*, *Postn*, *Thbs2*). *Postn* and *Aspn* were highly  
170 expressed in the mid-bulge and upper bulge epidermal stem cells, respectively, and their  
171 protein products have been shown to be accumulated in the sub-BM zone of the mid-  
172 bulge and upper bulge regions<sup>12, 15</sup>. Thus, epidermis-derived interstitial matrix  
173 molecules could determine the region-specific distribution of interstitial matrix

174 molecules at sub-BM zones, despite them being highly and broadly expressed in the  
175 dermis.

176

177 **ECM genes commonly or differentially expressed among different epidermal**  
178 **stem/progenitor cell populations**

179 To identify ECM genes commonly or differentially expressed among different  
180 epidermal stem/progenitor cell populations, we categorized ECM genes based on their  
181 cell-type-dependent expression patterns. We identified cell populations that express  
182 certain ECM genes significantly more than other cell populations based on the  
183 following criteria: a gene expression level in a cell population i) of FPKM value  $\geq 3$  and  
184 ii) more than 40% of the FPKM value of the most highly expressed cell population.

185 Categorized genes were depicted using a Venn diagram (Fig. 3a, Supplementary Table  
186 3). We identified a commonly expressed epidermal stem/progenitor ECM gene group at  
187 the middle of the Venn diagram (group 1 in Fig. 3a). This gene group included *Lama3*,  
188 *Lama5*, *Lamb2* and *Lamc1*, which are components of laminin-332 and laminin-521, the  
189 laminin isoforms important for basal keratinocyte adhesion to the BM<sup>26,27</sup>. *Crim1* is a  
190 transmembrane ECM gene and its defect results in embryonic skin blebbing and  
191 syndactyly<sup>28,29</sup>. For these common ECM genes, ECM adhesion- and hemidesmosome  
192 assembly-related Gene Ontology terms were overrepresented (Fig. 3b).

193 Region-specific ECM genes were sorted at the periphery of the Venn diagram.  
194 Our analysis identified 24 mid-bulge-enriched ECM genes (group 21). Gene Ontology  
195 analysis of these mid-bulge ECM genes revealed that they were associated with  
196 cartilage or chondrocyte morphogenesis (Fig. 3c), suggesting the production of an ECM  
197 niche for the interaction with muscles. Indeed, one of the mid-/upper bulge-derived

198 ECM proteins (group 15), nephronectin (*Npnt*), has been shown to play critical roles in  
 199 arrector pili muscle development<sup>15</sup>. *Coll17a1*, which is an important transmembrane

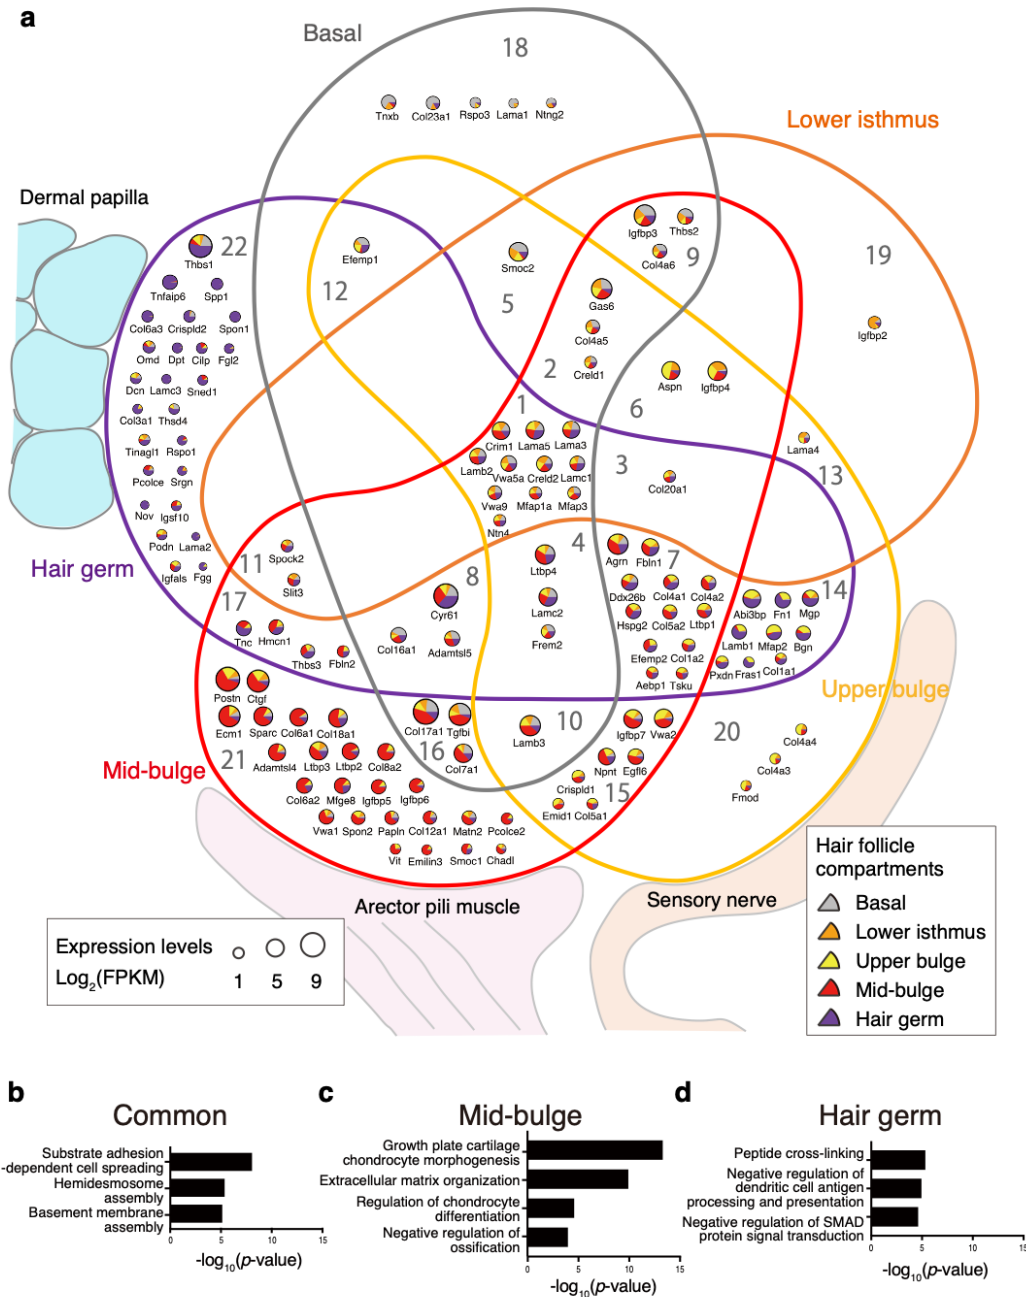

**Fig. 3** Classification of ECM genes based on their expression patterns in different epidermal cell compartments. **a** Venn diagram representation of the classification of ECM genes based on their expression in the epidermal cell compartments. Expression levels and ratios of each ECM gene are illustrated as a pie chart. The size and colours of the pie chart indicate the gene expression levels (lower left) and expressed compartments (lower right), respectively. To determine the presence or absence of regional expression, first, the maximum FPKM value of each gene among five epidermal compartments was obtained and expression levels relative to the maximum value were calculated for FPKM values in the other compartments. The threshold for adequate gene expression was set at more than 40% of the maximum FPKM and FPKM=3. Then, ECM genes were mapped in a Venn diagram based on their binarized expression data. Group numbers of ECM genes are marked in each category (see Supplementary Table 3). **b–d** Enriched GO terms analysed using common (b) or region-specific ECM genes (c, d).

200 ECM component for HF and interfollicular epidermal stem cell maintenance, was also  
201 identified as a mid-bulge-/basal-specific ECM gene (group 16)<sup>18, 21, 22</sup>. Sorting of these  
202 functionally important ECM genes into corresponding ECM gene groups demonstrates  
203 the reliability of the analysis.

204 Our analysis also identified 25 unique ECM genes highly enriched in HG  
205 (group 22). The SMAD signalling-related Gene Ontology term was overrepresented for  
206 these ECM genes (Fig. 3d). For example, *Thbs1* (thrombospondin-1), *Tnfaip6* (TSG-6)  
207 and *Spon1* (spondin-1/F-spondin) are involved in many morphological processes  
208 through TGF- $\beta$  family signal regulation<sup>30, 31, 32</sup>. Consistent with these findings, dermal-  
209 derived TGF- $\beta$ 2 is critical for the activation of HG cells during the hair cycle<sup>33</sup>. Another  
210 key signalling pathway for HG–DP interactions is the Wnt/ $\beta$ -catenin signalling  
211 pathway<sup>34</sup>. *Rspo1* (R-spondin), an agonist of Wnt/ $\beta$ -catenin signalling<sup>35</sup>, was identified  
212 as an HG-specific ECM component. These results demonstrate that HG stem/progenitor  
213 cells express ECM genes involved in morphogen/growth factor regulation.

214 The expression patterns of ECM receptor genes were also examined. Laminin  
215 binding receptors, *Itga3*, *Itga6*, *Itgb4*, *Itgb1*, *Dag1* and *Bcam*, and their associated  
216 tetraspanins were highly and broadly expressed in epidermal stem/progenitor cells  
217 (Supplementary Fig. 2). Integrins for interstitial ECM molecules, such as *Itga5*  
218 (fibronectin receptor), *Itga1* and *Itga2* (collagen receptors), were enriched in HG cells,  
219 consistent with their high expression of interstitial matrix genes (Fig. 1j). In comparison  
220 to ECM genes, ECM receptor genes show broader expression patterns in the epidermis.

221 Taken together, these results indicate that all epidermal stem/progenitor cells  
222 commonly express ECM genes that are involved in epidermal–BM adhesion, while each

223 epidermal stem/progenitor cell expresses region-specific ECM genes that play important  
 224 roles in regional epidermal–dermal interactions.

225

226 **ECM genes commonly or differentially expressed among different fibroblast**  
 227 **populations**

228 ECM genes expressed in fibroblast populations were categorized in the same manner as  
 229 in the epidermis (Fig. 4a, Supplementary Table 3). Although DP cells are a

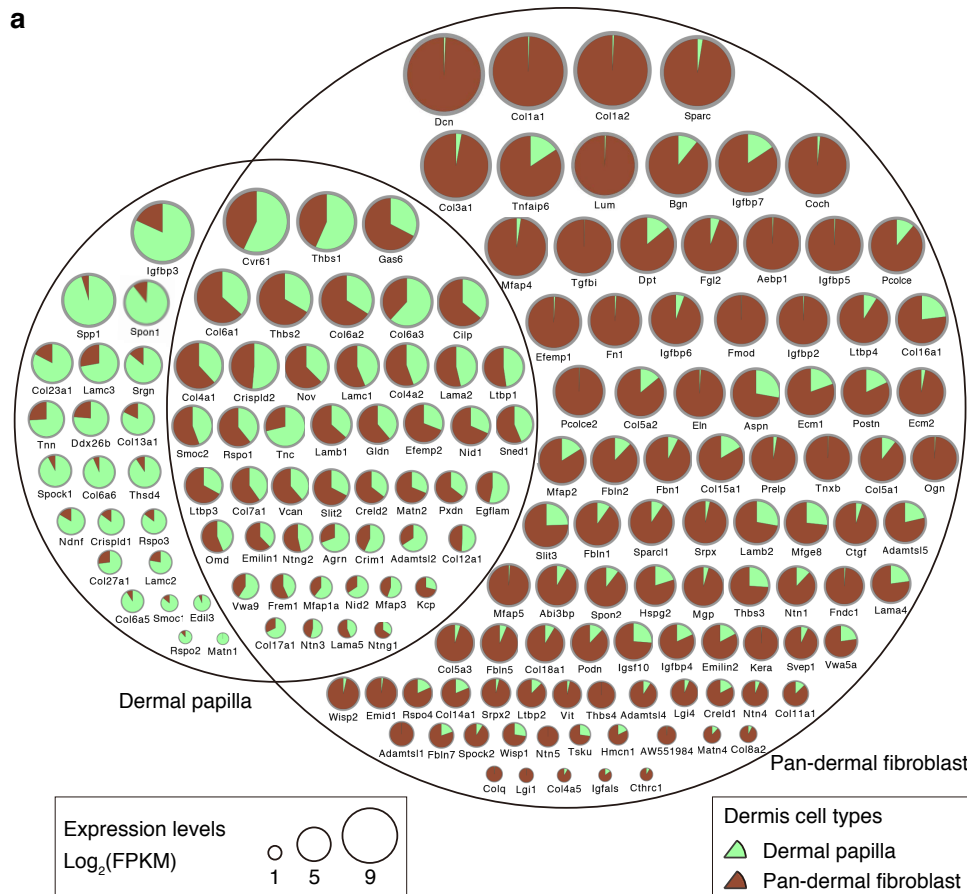

**b**

| Characteristic ECM genes specifically expressed in the DP            |                                             |
|----------------------------------------------------------------------|---------------------------------------------|
| Specifically expressed in the hair germ among epidermal compartments | Spp1, Spon1, Lamc3, Srgn, Thsd4             |
| Canonical Wnt signaling pathway (GO: 0060070)                        | Tnn, Rspo3, Rspo2                           |
| Heparin binding (GO: 0008201)                                        | Col23a1, Col13a1, Ndnf, Rspo3, Lamc2, Rspo2 |
| Membrane type collagen                                               | Col23a1, Col13a1                            |

**Fig. 4** Classification of ECM genes based on their expression patterns in different dermal compartments. **a** Venn diagram representation of the classification of ECM genes based on their expression in the dermal cell compartments. The pie chart visualization and binarization methods are the same as in Figure 3a. **b** Characteristic ECM genes specifically expressed in the DP. Of the DP-specific ECM genes in the dermis, five are also found in the HG-specific ECM gene group in the epidermis. Many other DP-specific ECM genes are categorized in biological process GO terms related to growth factor regulation (Canonical Wnt signalling pathway and Heparin binding).

230 subpopulation of dermal fibroblasts, they shut down the expression of many major  
231 interstitial ECM genes, including *Dcn*, *Colla1*, *Colla2*, *Sparc*, *Col3a1* and *Lum*.  
232 Instead, they expressed ECM genes highly expressed in HG epidermal cells (*i.e.* *Spp1*,  
233 *Spon1*, *Lamc3*, *Srgn*, *Thsd4*) (Fig. 4b). Spondin family genes, including *Spon1*, *Rspo2*  
234 and *Rspo3*, were also upregulated, suggesting their roles in localized Wnt signal  
235 regulation.

236

### 237 **ECM protein tissue atlas of mouse hair follicles**

238 We further examined the tissue localization of commonly or regionally expressed  
239 epidermal and dermal ECM proteins by immunostaining and generated an ECM protein  
240 tissue atlas of mouse HFs. We used antibodies against 66 ECM proteins (tested 90  
241 antibodies) and determined their immunostaining conditions with rigorous validation  
242 for specificity. Among them, 41 antibodies showed ECM-like extracellular deposition  
243 patterns (Supplementary Table 4). Immunostaining patterns of representative ECM  
244 proteins for each HF compartment are shown in Figure 5a and those of all 39 ECM  
245 components are shown in Supplementary Figure 3. Protein deposition levels of 34 ECM  
246 proteins were quantified and represented as a heatmap (Fig. 5b) and radar charts (Fig.  
247 5c). These data clearly demonstrated that most ECM proteins detected showed tissue  
248 deposition patterns consistent with their gene expression patterns. For example,  
249 commonly expressed ECM components, such as laminin-332 (*Lama3*), laminin  $\alpha$ 5  
250 (*Lama5*) and laminin  $\beta$ 2 (*Lamb2*), were broadly detected in the BM zone of the  
251 interfollicular epidermis and HF (Fig. 5a–c). In contrast, ECM proteins specifically  
252 expressed in upper bulge, mid-bulge, HG and DP were preferentially deposited in their

253 own cell compartments (Fig 5a, b, d–g), indicating that most ECM proteins are locally  
 254 synthesized and deposited into matrices.

255 Each column of the heatmap defines the ECM niche of each cellular

256 compartment and clarifies the molecular differences (Fig. 5b and Supplementary Fig.

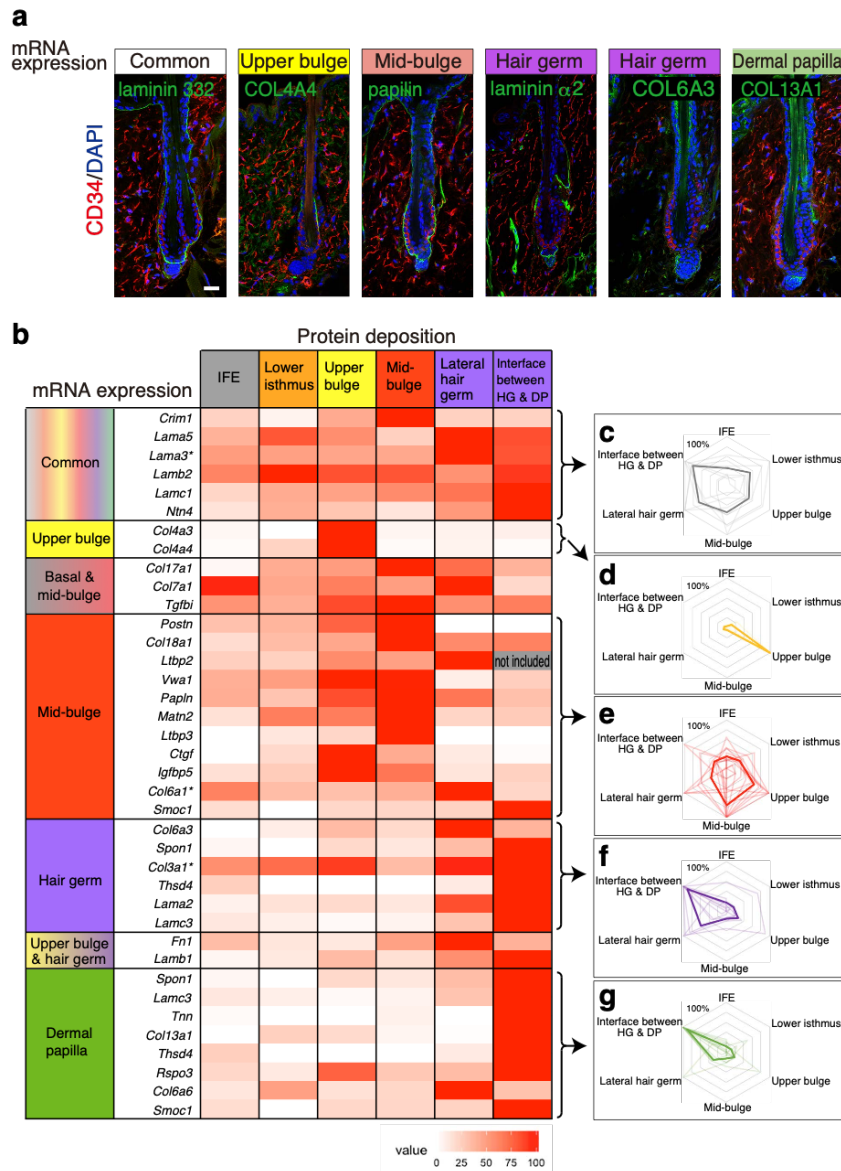

**Fig. 5** Specialized ECM niches and their cellular origins in the adult telogen hair follicle. **a** Representative tissue localization patterns of ECM proteins expressed as common or region-specific ECM genes. Immunofluorescence detection of each target ECM protein (green) and CD34 (red) in dorsal telogen HFs is shown with DAPI counterstaining (blue). Scale bar, 20  $\mu$ m. **b** Heatmap displaying the quantified deposition levels of ECM proteins. Using immunofluorescent histochemical staining data (Fig. 5a, Supplementary Fig. 3), signal intensities of ECM proteins deposited at the divided BM regions were measured as percentage values and depicted in a heatmap. Skin BM was regionalized into six areas as shown at the top of the heatmap. The major cellular origins of each ECM molecule are indicated at the left panel of the heatmap. Asterisks on the gene symbol indicate the use of an antibody that does not distinguish a subunit composing ECM protein complexes. IFE: interfollicular epidermis. **c–g** Radar chart analysis of protein tissue distributions of region-specific ECM genes. Each radar chart consists of six BM regions. Quantified deposition levels of ECM proteins in (b) are plotted and represented as thin lines and their average patterns are depicted by a bold line [common in (c), upper bulge in (d), mid-bulge in (e), HG in (f) and DP in (g)].



257 4). The epidermal BM showed a clear boundary of ECM deposition, like a patchwork,  
258 even though the BM is a continuous sheet-like structure. Many region-specific ECM  
259 proteins showed consistent deposition borders with those of CD34 bulge marker  
260 expression, suggesting that ECM environments are specialized along epidermal cellular  
261 compartments. We also found that the ECM composition clearly differed between HG  
262 lateral BM and HG–DP interface BM, a finding that is explored further below.

263

#### 264 **Identification of BM micro-niches along epithelial–mesenchymal interfaces**

265 We next probed the diversity within the BM niches in the HG–DP unit, which governs  
266 HF morphogenesis and regeneration, with the ECM protein tissue atlas. The first  
267 notable feature that we found was the lack of reticular lamina components in the BM  
268 forming the interface between HG and DP. The reticular lamina components, COL6  
269 (*Col6a1, a3, a6*) and COL7 (*Col7a1*), were absent or present at very low levels at the  
270 interface BM (Fig. 6a arrows). The hemidesmosome component COL17 (*Coll17a1*) was  
271 also absent from the interface BM (Fig. 6a arrow). We thus postulated that the interface  
272 BM has altered BM and/or hemidesmosome structures. We then examined the  
273 expression patterns of the intracellular hemidesmosome protein plectin and found that it  
274 was also absent from the interface BM zone (Fig. 6b arrow). Ultrastructural  
275 examination revealed that the number of electron-dense hemidesmosome-like structures  
276 was reduced at the interface BM (Fig. 6c–f). Notably, the lamina densa structure at the  
277 interface BM showed protrusions toward the dermis (Fig. 6g arrows), while these  
278 protrusions were not observed in the lateral BM. These lamina densa protrusions  
279 preferentially originated from hemidesmosome-like structures (Fig. 6g arrowheads). It  
280 has been reported that the BM of the neuromuscular junction also lacks reticular lamina

281 and extends protrusions from active zones to junctional folds of muscle fiber<sup>36,37</sup>. Thus,  
282 our analysis identified close parallels in molecular composition and structure of the BM  
283 between the HG–DP interface and neuromuscular junction.

284 We further identified two additional specialized BM structures in the HG–DP  
285 unit. Laminin  $\alpha 5$  staining showed large protrusions from the interface BM into the  
286 centre of the DP where a nuclear signal was lacking (Fig. 7a). Another core BM  
287 molecule, perlecan, overlapped with laminin  $\alpha 5$ , indicating that these protrusions are

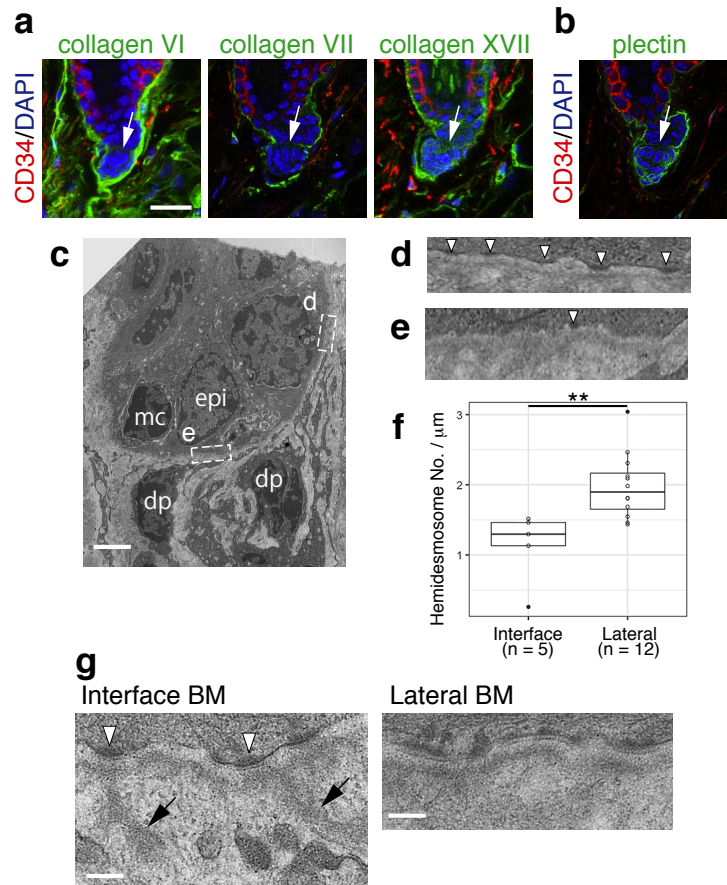

**Fig. 6** Absence of reticular lamina, fewer hemidesmosomes and extension of BM protrusions at the hair germ and dermal papilla interface. **a, b** Immunolocalizations of reticular lamina-related ECMs, COL6 and COL7, and hemidesmosomal components, COL17 (a) and plectin (b), in dorsal telogen HFs. These ECMs and plectin (green) were co-stained with CD34 (red) and DAPI (blue). White arrows indicate the interface between HG and DP. **c** Transmission electron microscopy (TEM) image of HG and DP region. epi, epidermal HG cell; mc, melanocyte; dp, DP cell. **d, e** Magnified images of HG–BM adhesion sites located at the lateral side (d) and interface side (e) of the HG region (c). Hemidesmosome structures are indicated by white arrowheads. **f** Box plot of the hemidesmosome densities of HG cells located at the lateral or interface sides of the HG region. \*\*  $p < 0.01$ , Mann–Whitney U test (two-tailed). **g** BM protrusions observed at the interface BM. BM protrusions extending into the interstitial space are marked with arrows. Hemidesmosome structures are indicated by white arrowheads. Scale bars: 20  $\mu\text{m}$  (a), 2  $\mu\text{m}$  (c), 500 nm (g).

288 continuous extensions of the BM. Three-dimensional image analysis showed that this  
 289 ECM structure resembles a hook that fastens DP to the HG (Fig. 7b). Thus, we named  
 290 this novel ECM structure the ‘hook BM’. The hook BM also contains other major BM  
 291 molecules, including laminin  $\alpha 2$ ,  $\alpha 4$ ,  $\beta 1$ ,  $\beta 2$ ,  $\gamma 1$ ,  $\gamma 3$ , nidogen-1, -2 and COL4, but not

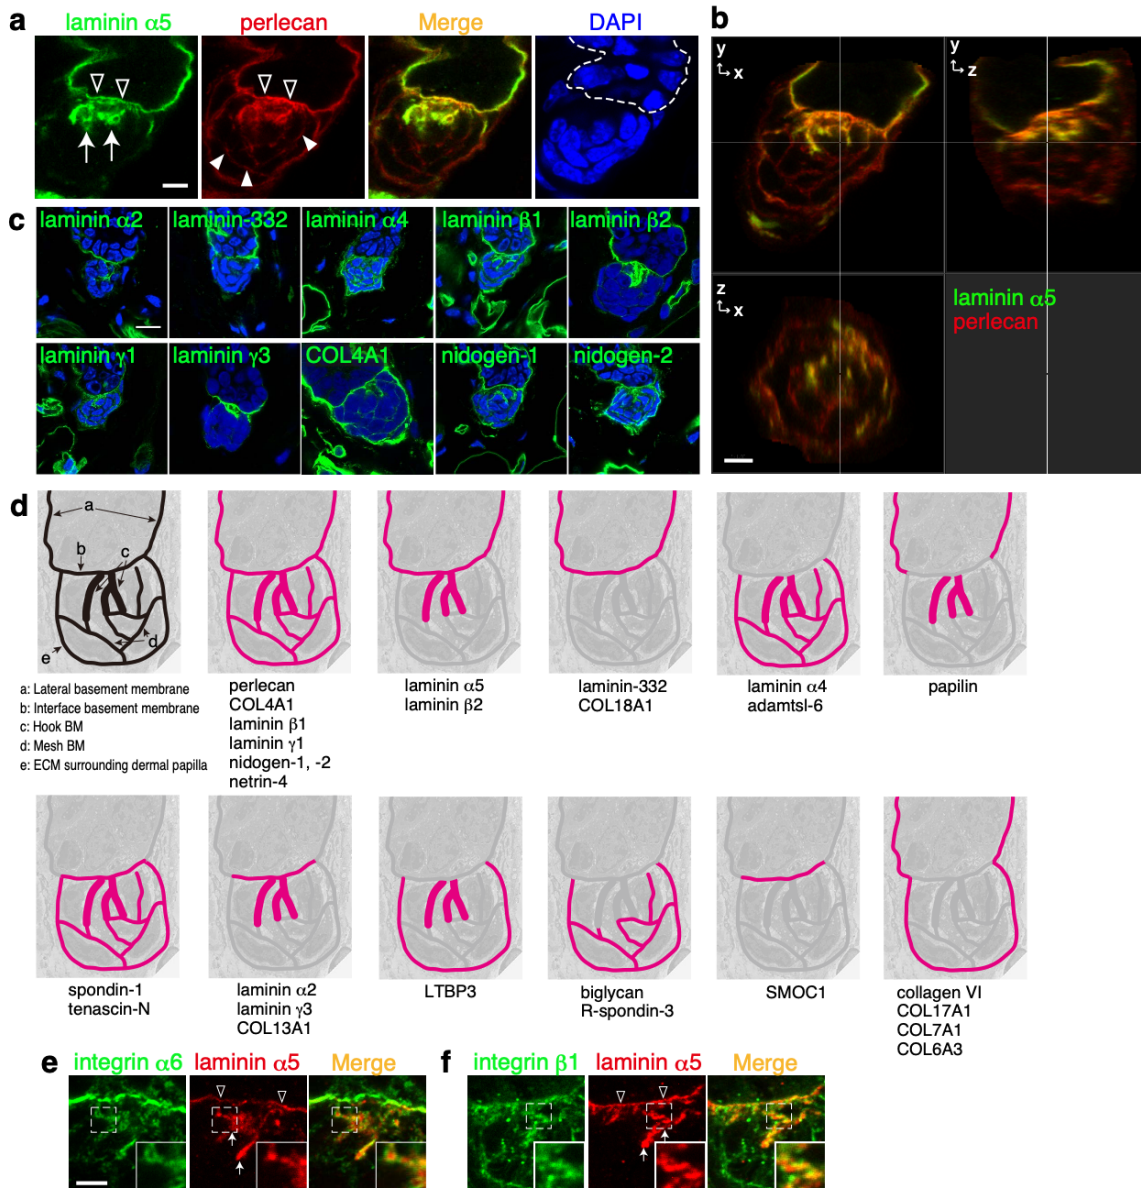

**Fig. 7** Identification of hook and mesh BMs in the hair germ–dermal papilla unit. **a** Immunofluorescence labelling of dorsal telogen HF. Both laminin  $\alpha 5$  (green) and perlecan (red) are detected in a hook-shaped BM (arrows) extending from the interface BM (open arrowheads). Perlecan also forms a mesh-like BM (filled arrowheads) within the DP. Dashed line indicates the epidermal–dermal boundary. **b** Three-dimensional observation of the hook and mesh BMs in (a). **c** Immunolocalizations of major BM proteins (green) in the hook and mesh BMs of dorsal telogen HF. Nuclei were stained with DAPI (blue). **d** Graphical representation of the regional BM compositions in the HG–DP unit. Upper left-hand panel depicts the distinct BM structures. Other panels schematically summarize deposition patterns of BM components examined in a, c and Supplementary Fig. 3. **e, f** Close localization of dermal integrins with laminin  $\alpha 5$ -containing hook and interface BMs. Integrin  $\alpha 6$  (e, green) or  $\beta 1$  (f, green) was co-immunostained with laminin  $\alpha 5$  (red). Insets are magnified views of the dotted squares. Arrows and open arrowheads indicate the hook BM and interface BM, respectively. Scale bars: 5  $\mu\text{m}$  (a, b), 10  $\mu\text{m}$  (c), 3  $\mu\text{m}$  (e, f).

292 laminin-332, suggesting that the major laminin isoforms in the hook BM are laminin  
293  $\alpha 2$ ,  $\alpha 4$  and  $\alpha 5$  chain-containing laminins (Fig. 7c). Among them,  $\gamma 3$  chain-containing  
294 laminin isoforms are unable to bind to integrins<sup>38</sup>, suggesting their role in regulating  
295 integrin binding properties of hook and interface BMs. We also noticed a mesh-like  
296 deposition of perlecan within the DP (Fig. 7a). This mesh-like ECM structure extended  
297 to the interspace among DP cells and was directly connected to the interface and hook  
298 BMs. We named this ECM structure the ‘mesh BM’. The mesh BM also contains  
299 laminin  $\alpha 4$ ,  $\beta 1$ ,  $\gamma 1$ , nidogen-1, -2 and COL4, but not laminin  $\alpha 2$ ,  $\alpha 5$ ,  $\beta 2$ ,  $\gamma 3$  and  
300 laminin-332, suggesting that the major laminin isoform of the mesh BM is laminin-411.  
301 We also found that other BM molecules, such as netrin-4, LTBP3, adamts1-6, tenascin-N  
302 and COL13A1, were located in the hook BM, while spondin-1, adamts1-6, biglycan,  
303 tenascin-N and R-spondin-3 were localized in the mesh BM (Supplementary Fig. 5a).  
304 Both epidermal and dermal cell compartments contribute to producing these BM  
305 components (Fig. 2). Taking these findings together, the ECM protein tissue atlas  
306 revealed exquisite molecular and structural diversity of BM micro-niches at the HG–DP  
307 interface (Fig. 7d) and showed that the BM is the primary ECM niche for DP cells.

308 To identify potential ECM receptors for these BMs, we examined the  
309 expression levels of major ECM receptors in DP and pan-dermal fibroblasts. We found  
310 that DP cells highly expressed laminin-binding integrins (*Itga6* and *Itga3*)<sup>39</sup> and Wnt  
311 signal regulator glypicans (*Gpc1* and *Gpc2*)<sup>40, 41</sup> (Supplementary Fig. 5b).  
312 Immunohistochemical detection of integrins showed that the integrins  $\alpha 3$ ,  $\alpha 5$ ,  $\alpha 6$ ,  $\alpha 8$ ,  
313  $\beta 1$  and  $\beta 4$  were enriched at the interface BM region,  $\alpha 6$ ,  $\alpha v$  and  $\beta 1$  were located at the  
314 hook BM region, while integrins  $\alpha 5$ ,  $\alpha 6$ ,  $\alpha 9$ ,  $\alpha v$  and  $\beta 1$  were enriched at the mesh BM  
315 region (Supplementary Fig. 5c). Super-resolution microscopic images revealed that the

316 integrins  $\alpha 6$  and  $\beta 1$ , which form an integrin  $\alpha 6\beta 1$  heterodimer that binds to laminin  $\alpha 5$   
317 chain-containing laminins<sup>39</sup>, tightly associated with laminin  $\alpha 5$  in the interface and  
318 hook BMs, suggesting that integrin  $\alpha 6\beta 1$  on DP cells interacts with the interface and  
319 hook BMs (Fig. 7e, f).

320 To investigate the interactions between BMs and dermal cells, we performed  
321 electron microscopic analysis. Ultrastructural analysis visualized the close associations  
322 of BM protrusions and cellular protrusions of DP and dermal stem cells at the interface  
323 and hook BM regions (Supplementary Fig. 6a–e). In contrast, DP cells located away  
324 from the interface and hook BMs, where the mesh BM is located, exhibited relatively  
325 smooth and flat cell membrane structures (Supplementary Fig. 6f, g). Cell–cell  
326 interactions among DP and dermal stem cells were rarely observed; instead, the  
327 interface, hook and mesh BMs cohered these dermal cells. These results demonstrated  
328 that epidermal HG cells, DP cells and dermal stem cells are aggregated by tangling with  
329 a continuous BM structure, which have regionally specialized molecular compositions  
330 and structures. Taking the findings together, our analysis revealed a remarkable degree  
331 of molecular and structural complexity of the BM niches and a variety of cell–BM  
332 interactions at the HG–DP interface. The findings also indicate the existence of  
333 asymmetrically organized side-specific heterogeneity in BM composition and structure  
334 in this inter-tissue interface.

335

336 **Epidermal laminin  $\alpha 5$  is required for the topological and functional integrity of the**  
337 **hair germ–dermal papilla unit**

338 Laminin  $\alpha 5$  appeared to be a major cell adhesion ligand for both HG and DP cells, and  
339 has also been reported to be involved in HF morphogenesis<sup>27, 42</sup>, therefore, we examined

340 the effects of the deletion of the *lama5* gene at this interface. To investigate the cellular  
341 origin of laminin  $\alpha 5$  at the interface, *Lama5* floxed mice were crossed with Keratin 5-  
342 Cre mice, which specifically express Cre in the basal epidermal compartment. In the  
343 mutant, immunoreactivity of laminin  $\alpha 5$  disappeared from the interface and hook BMs,  
344 demonstrating that the laminin  $\alpha 5$  in these BMs is derived from the epidermis (Fig. 8a).  
345 This result is consistent with our transcriptome data showing that *Lama5* is of epidermal  
346 origin (Fig. 2, Supplementary Table 2). The deletion of *Lama5* resulted in the failure in  
347 forming the bell-shaped epidermal structure at the tip of the developing whisker HFs  
348 (Fig. 8b). Furthermore, mutant DP did not show a prolate spheroid structure, but  
349 retained a round shape. Thus, the geometry of the HG–DP interface was significantly  
350 altered in the mutant, indicating that laminin  $\alpha 5$  is an important regulatory element of  
351 tissue topology and cellular arrangement of the HG–DP unit.

352 In accordance with the anatomical defects, hair growth was significantly  
353 reduced in the newborn mutant mice (Fig. 8c). We also investigated the continuum of  
354 hair cycle stages by observing hair cycle domain patterns on living mice<sup>43</sup>. In the  
355 mutants, the onset of the first catagen (regression phase between the growing anagen  
356 phase and resting telogen phase), was delayed, while HFs entered the next anagen at the  
357 same timing as the control mice without showing clear telogen transition (Fig. 8d, e). In  
358 the second telogen phase (~P45–80), the mutants showed precocious anagen entry and  
359 exhibited a hair regenerative wave traveling from the tail to the head in the dorsal skin  
360 (Fig. 8e, f), suggesting the misregulation of signalling events for cyclic HF  
361 regeneration. Taken together, these results indicate that epidermal-derived laminin  $\alpha 5$  at  
362 the HG–DP interface plays a key role in the topological and functional integrity of the  
363 HG–DP unit.

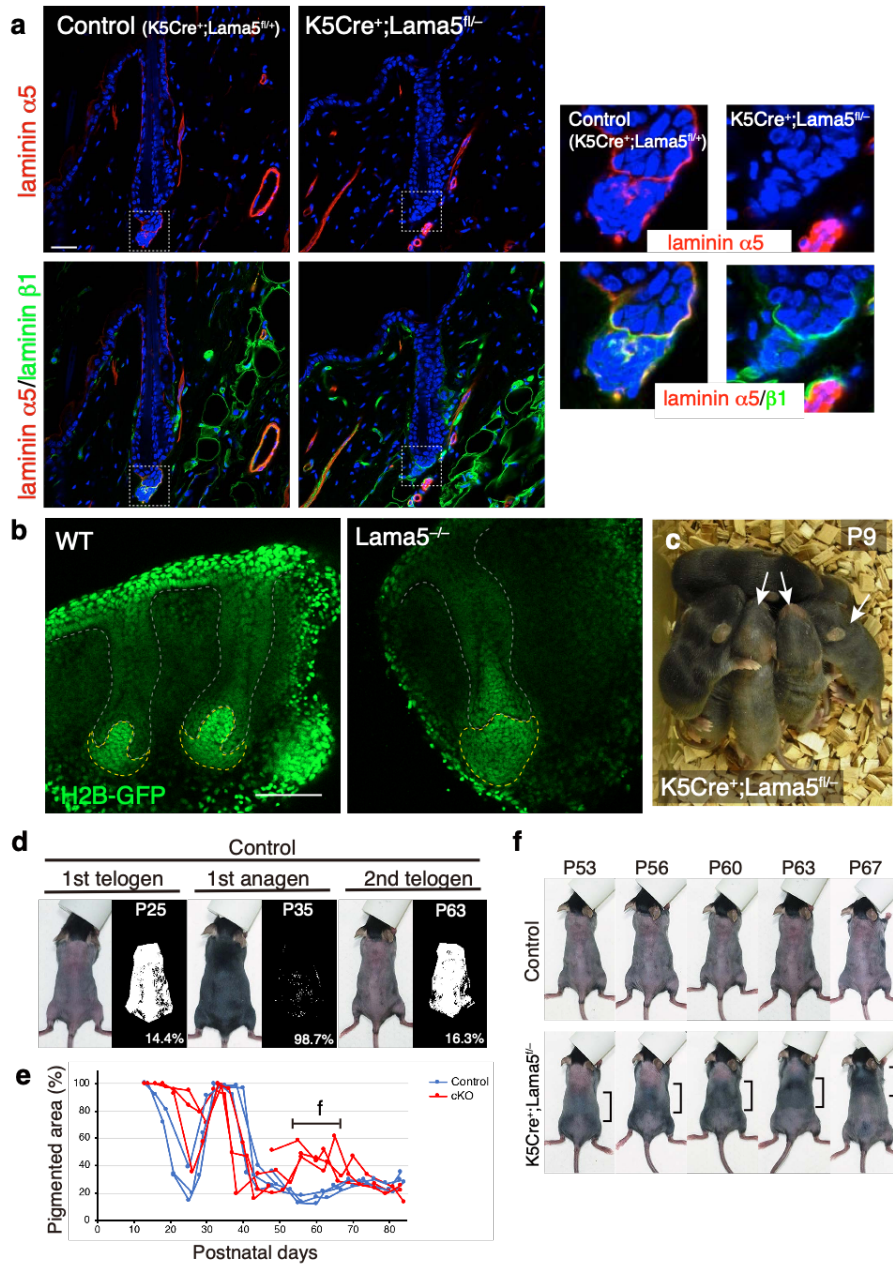

**Fig. 8** Laminin  $\alpha 5$  is required for the topological and functional integrity of hair germ–dermal papilla unit. **a** Immunohistochemical examination of laminins  $\alpha 5$  (red) and  $\beta 1$  (green) in the dorsal telogen HFs of control (K5Cre<sup>+</sup>;Lama5<sup>fl/+</sup>) and K5Cre<sup>+</sup>;Lama5<sup>fl/-</sup> mice. Magnified images of the dotted squares are shown (right panels). **b** Fluorescent images of developing whisker HFs in E14.5 R26-H2B-GFP (WT) and R26-H2B-GFP;Lama5<sup>-/-</sup> embryos. Grey dotted lines indicate the border between epidermis and dermis. Yellow dotted lines indicate the border of dermal papilla. **c** Gross appearance of newborn K5Cre<sup>+</sup>;Lama5<sup>fl/-</sup> mice (arrows) with their control littermates. Hair growth is delayed. **d** Measurement of pigmented skin areas. Pigmented area, which is associated with the presence of anagen HF, on the shaved dorsal skin was determined from binarized photos (right side of each panel) at various postnatal days (P). **e** Comparison of hair cycle patterns between control and mutant mice. Ratio of pigmented area represents the ratio of anagen HFs. Four litter pairs were examined. One pair of littermates was examined from P21 to P47 and another pair of littermates was examined from P48. A horizontal bar indicates the period for detailed hair cycle pattern analysis shown in f. **f** Precocious anagen entry and the formation of traveling hair regeneration wave in K5Cre<sup>+</sup>;Lama5<sup>fl/-</sup> mice. Scale bars: 100  $\mu$ m (b).

365 **Discussion**

366 One of the important issues regarding the ECM is how the ECM composition and  
367 structure are spatiotemporally specialized to orchestrate organ formation and function.  
368 However, the entire molecular landscape of the ECM composition and its pattern-  
369 forming processes in all organs remain largely unknown. Here, we systematically and  
370 thoroughly identified the cellular origins, molecular identities and tissue distribution  
371 patterns of ECMs in the mouse HF at high spatial resolution in a semi-quantitative  
372 manner. Our study provides the first comprehensive overview of the ECM landscape  
373 within the adult HF and highlights how ECM composition is regionally specialized for  
374 each cell type and distinct inter-tissue interactions.

375

376 **Mapping both transcriptome and protein tissue localization of the ECM with high**  
377 **spatial resolution**

378 There are two major strategies to make regionally specialized ECMs: synthesis locally  
379 at a target cell/tissue or selective accumulation of ECMs from a distant source<sup>3</sup>. Our  
380 combinatorial systematic ECM mRNA and protein mapping approach revealed that, at  
381 least in the epidermal–dermal interface, most ECM molecules are synthesized locally  
382 and accumulated in adjacent ECMs, indicating that localized ECM expression is a major  
383 determinant of the ECM environment for both epidermal and dermal populations. This  
384 seems reasonable, but is also surprising because very different combinations of ECM  
385 proteins can be deposited locally together, despite the interaction and assembly of ECM  
386 molecules being considered to be regulated by specific molecular interactions<sup>24</sup>. This  
387 suggests the existence of molecular interaction networks within the locally expressed  
388 ECM molecules for their effective assembly and turnover. Our data also suggest that the



389 ECM niche of each cell type can be well predicted from gene expression profiles of  
390 their own and neighbouring cells. This finding lays the foundation for predicting ECM  
391 niches of single cells within tissues by using large-scale single-cell gene expression  
392 datasets, such as the Human Cell Atlas<sup>44</sup>, Human Biomolecular Atlas Program  
393 (HuBMAP)<sup>45</sup> and the mouse atlas *Tabula Muris*<sup>46</sup>.

394 Our analysis also identified ECM proteins that exhibited inconsistent tissue  
395 localization patterns between mRNA and protein. For example, *Crim1* was categorized  
396 as a commonly expressed epidermal ECM gene, but its protein product was enriched at  
397 the bulge. In addition, fibroblast-derived BM proteins such as laminin  $\alpha 2$ ,  $\alpha 4$  and  
398 COL4 also exhibited distinct localization patterns in the BM despite being highly  
399 expressed in a distant source, pan-dermal fibroblasts. These findings imply the existence  
400 of molecule-specific long-range ECM transport and assembly mechanisms, as reported  
401 previously in *Drosophila*<sup>47</sup>. Although it is unclear how their tissue localizations are  
402 regulated, ECM receptors and other interacting ECM proteins play roles in their tissue  
403 localization. Deeper and/or more diverse systematic molecular profiling and  
404 computational analysis of the expression and localization of ECM molecules and  
405 receptors will help us understand how distinct ECM niches are generated.

406 Our antibody-based ECM mapping revealed complex subcellular ECM  
407 distributions, leading to the identification of the hook and mesh BMs. These matrices  
408 form molecularly and structurally fine-tuned ECM niches at the HG–DP interface. This  
409 level of spatial mapping resolution cannot be achieved by other current proteome  
410 approaches such as mass spectrometry<sup>48, 49</sup>. Thus, merged antibody-based spatial ECM  
411 protein and single-cell mRNA expression profiles can precisely relate ECM  
412 compositions to the position of cells and molecules, thus providing distinct ECM niche

413 information and a common anatomical reference for normal, aged and pathological  
414 tissue structures.

415

416 **The BM provides a tailored interface for distinct inter-tissue interactions**

417 The BM can simultaneously function as both a tissue insulator and glue, keeping  
418 different cell populations in close vicinity of each other with a clear tissue boundary<sup>3</sup>.  
419 Our analysis clearly showed that the molecular composition and structure of the BM are  
420 specialized for distinct inter-tissue interactions. The mid-bulge BM is composed of  
421 ECM molecules related to chondrocyte morphogenesis for the interaction with arrector  
422 pili muscles<sup>15</sup>. Surprisingly, these chondrocyte-related ECM molecules are derived from  
423 epidermal bulge stem cells, but not from chondrocytes or related cell types, indicating  
424 that epidermal bulge stem cells actively participate in cooperative formation of the  
425 niche for epidermal-muscle inter-tissue interactions. To this end, bulge stem cells need  
426 to activate a transcriptional network for chondrocyte ECM expression. Indeed, *Sox9* and  
427 *Scx*, master transcription factors for chondrocytes and tenocytes, are highly expressed in  
428 the bulge stem cells, potentially contributing to establish a BM niche for epidermal–  
429 muscle interactions<sup>15, 50, 51</sup>. In contrast, HG cells express a very different set of ECM  
430 genes, including those related to growth factor signalling, such as SMAD/TGF- $\beta$   
431 signalling and Wnt signalling. These signalling pathways are critical regulators of HG–  
432 DP interactions and HF morphogenesis and regeneration<sup>16</sup>. This marked difference in  
433 ECM expression patterns in the adjoining epidermal compartments reflects their  
434 different counterpart tissues for inter-tissue interactions. Thus, one of the major reasons  
435 for the heterogeneity and compartmentalization of epidermal basal stem/progenitor cells

436 and their BM composition is to establish distinct inter-tissue interfaces between the  
437 epidermis and dermis<sup>10</sup>.

438         The absence of reticular lamina may allow intimate inter-tissue interactions by  
439 providing laminin–integrin interactions at both epidermal and dermal sides of the BM.  
440 We found that the BM between HG and DP lacks reticular lamina components, such as  
441 COL6 and COL7. This BM extends many protrusions from epidermal hemidesmosome-  
442 like structures toward the DP and dermal stem cells and forms laminin–integrin  
443 complexes at the dermal side. An analogous BM structure can be observed in the  
444 neuromuscular junction, where the reticular lamina is excluded and the BM extends  
445 protrusions from synaptic active zones toward junctional folds that invaginate the  
446 postsynaptic muscle membrane<sup>36</sup>. Laminin–integrin interactions can be observed on  
447 both nerve and muscle sides of the BM and play critical roles in the formation and  
448 function of neuromuscular junctions<sup>52, 53</sup>. Moreover, COL7 is absent from lung alveoli,  
449 blood vessels and kidneys, where different tissues are tightly integrated via the BM that  
450 places laminins at both its sides<sup>1, 2, 54, 55, 56</sup>. Thus, it is likely that the absence of the  
451 reticular lamina enables the placement of laminins on both sides of the BM.

452

#### 453 **Existence of BM micro-niches in the hair germ–dermal papilla unit**

454 There are numerous reports on the identification of signalling molecules involved in  
455 HG–DP interactions. These interactions would be governed by the spatial organization  
456 of heterogeneous HG and DP cells and their specialized micro-niches<sup>57</sup>. However, only  
457 limited information is available on the molecular identities of the extracellular space in  
458 the HG–DP unit. Our study revealed that the molecular composition of BM niches in  
459 the HG–DP unit is exquisitely tailored at the cellular level, likely to allow for

460 coordinated multi-lineage interactions. HG–DP interactions have the following key  
461 features: i) DP cells form a packed cluster despite them being scatter-prone fibroblasts,  
462 ii) DP cells constantly attach to the HG region despite HFs undergoing dynamic tissue  
463 regeneration and iii) HG and DP cells actively exchange signals via soluble factors such  
464 as Wnts, BMPs, FGFs and TGF- $\beta$ s<sup>16</sup>. The mesh BM could help provide feature i)  
465 because the cell–cell interactions of DP cells were limited; instead, the mesh BM  
466 cohered laminin-receptor-expressing DP cells. The interface, mesh and hook BM  
467 complex can potentially underpin features ii) and iii) because these BMs were  
468 physically connected and preferentially composed of different adhesion and soluble  
469 signalling-related ECM molecules. In fact, the deletion of an epidermal-derived  
470 interface and hook BM molecule laminin  $\alpha$ 5 resulted in disruption of the topological  
471 and functional integrity of the HG–DP unit during HF development and regeneration.  
472 Laminin  $\alpha$ 5 has been reported to be involved in many morphological processes via  
473 regulating integrin-mediated cell adhesion and growth factor-mediated signalling  
474 events<sup>58</sup>. In the skin, laminin  $\alpha$ 5 regulates keratinocyte adhesion, proliferation and  
475 migration, and is also suggested to be involved in growth factor signalling in the HFs<sup>42</sup>,  
476 <sup>59, 60, 61</sup>. Thus, laminin  $\alpha$ 5 could function as a direct adhesion target for both HG and DP  
477 cells and could also regulate the tissue distribution and activity of growth factors.

478 Inter-tissue interactions are essential for the development, regeneration and  
479 functions of most organs. They have their own tailored BMs as structural and functional  
480 interfaces of inter-tissue interactions. Thus, future work should further characterize the  
481 molecular and structural properties of distinct BMs and their dynamics in inter-tissue  
482 interactions and reveal their significance in the coordination of multi-lineage

483 interactions. This work provides a paradigm for understanding the role of BM

484 heterogeneity in mediating inter-tissue interactions in multicellularity.

485 **Author Contributions**

486 K.T. designed and carried out experiments, analysed data and wrote the manuscript.  
487 H.M. designed and carried out experiments and analysed data. A.N. provided technical  
488 support. R.M. examined phenotypes of whisker follicles of *Lama5*<sup>-/-</sup> mice. J.H.M.  
489 provided *Lama5* floxed and knockout mice. K.S. provided antibodies against vwa1,  
490 papilin, TGFBI, adamts1-6, abi3bp, laminin  $\beta$ 2 and  $\gamma$ 3. H.F. conceived the project,  
491 designed and supervised experiments, analysed data and wrote the manuscript.

492

493 **Acknowledgements**

494 We thank Shigehiro Kuraku, Chiharu Tanegashima, Sean D. Keeley, Yuichiro Hara and  
495 Osamu Nishimura of the Laboratory for Phyloinformatics, RIKEN, for help with the  
496 RNA-seq and bioinformatics; Yasuko Tomono (Shigei Medical Research Institute) for  
497 antibodies against type IV collagens; Yoshiaki Hirako (Nagoya University) for antibody  
498 against type XVII collagen; Phillipe Soriano (Mount Sinai NY) for *Pdgfra-H2B-eGFP*  
499 mice (*Pdgfra*<sup>tm11(EGFP)Sor</sup>); Jose Jorcano (CIEMAT-CIBERER, Madrid, Spain) for K5-  
500 Cre mice; Takaya Abe (RIKEN BDR) for R26-H2B-EGFP mice; and RIKEN Kobe  
501 light microscopy and animal facilities for technical assistance. We also thank members  
502 of the Fujiwara laboratory for valuable reagents and discussions. This work was funded  
503 by RIKEN intramural funding, RIKEN ‘Epigenome and Disease’, JSPS KAKENHI  
504 (25122720, 26670533), JST CREST (JPMJCR1926), Uehara Memorial Foundation,  
505 Takeda Science Foundation and Cosmetology Research Foundation (all to H.F.). H.M.  
506 was supported by the RIKEN Junior Research Associate (JRA) program.

507

508 **Competing interests**

509 The authors declare that they have no competing interests.

510 **References**

- 511 1. Keeley DP, Sherwood DR. Tissue linkage through adjoining basement  
512 membranes: The long and the short term of it. *Matrix Biol* **75-76**, 58-71 (2019).  
513
- 514 2. Sekiguchi R, Yamada KM. Basement membranes in development and disease.  
515 *Curr Top Dev Biol* **130**, 143-191 (2018).  
516
- 517 3. Brown NH. Extracellular matrix in development: insights from mechanisms  
518 conserved between invertebrates and vertebrates. *Cold Spring Harb Perspect Biol*  
519 **3**, a005082 (2011).  
520
- 521 4. Hynes RO. The extracellular matrix: not just pretty fibrils. *Science* **326**, 1216-  
522 1219 (2009).  
523
- 524 5. Lu P, Weaver VM, Werb Z. The extracellular matrix: a dynamic niche in cancer  
525 progression. *The Journal of cell biology* **196**, 395-406 (2012).  
526
- 527 6. Hynes RO, Naba A. Overview of the matrisome--an inventory of extracellular  
528 matrix constituents and functions. *Cold Spring Harb Perspect Biol* **4**, a004903  
529 (2012).  
530
- 531 7. Manabe R, *et al.* Transcriptome-based systematic identification of extracellular  
532 matrix proteins. *Proc Natl Acad Sci U S A* **105**, 12849-12854 (2008).  
533
- 534 8. Watt FM, Fujiwara H. Cell-extracellular matrix interactions in normal and  
535 diseased skin. *Cold Spring Harb Perspect Biol* **3**, a005124 (2011).  
536
- 537 9. Naba A, Clauser KR, Hoersch S, Liu H, Carr SA, Hynes RO. The matrisome: in  
538 silico definition and in vivo characterization by proteomics of normal and tumor  
539 extracellular matrices. *Mol Cell Proteomics* **11**, M111 014647 (2012).  
540
- 541 10. Fujiwara H, Tsutsui K, Morita R. Multi-tasking epidermal stem cells: Beyond  
542 epidermal maintenance. *Dev Growth Differ* **60**, 531-541 (2018).  
543
- 544 11. Solanas G, Benitah SA. Regenerating the skin: a task for the heterogeneous stem  
545 cell pool and surrounding niche. *Nat Rev Mol Cell Biol* **14**, 737-748 (2013).



- 546
- 547 12. Cheng CC, *et al.* Hair follicle epidermal stem cells define a niche for tactile  
548 sensation. *Elife* **7**, e38883 (2018).
- 549
- 550 13. Li L, Ginty DD. The structure and organization of lanceolate mechanosensory  
551 complexes at mouse hair follicles. *Elife* **3**, e01901 (2014).
- 552
- 553 14. Brownell I, Guevara E, Bai CB, Loomis CA, Joyner AL. Nerve-derived sonic  
554 hedgehog defines a niche for hair follicle stem cells capable of becoming  
555 epidermal stem cells. *Cell Stem Cell* **8**, 552-565 (2011).
- 556
- 557 15. Fujiwara H, *et al.* The basement membrane of hair follicle stem cells is a muscle  
558 cell niche. *Cell* **144**, 577-589 (2011).
- 559
- 560 16. Sennett R, Rendl M. Mesenchymal-epithelial interactions during hair follicle  
561 morphogenesis and cycling. *Semin Cell Dev Biol* **23**, 917-927 (2012).
- 562
- 563 17. Watt FM. Role of integrins in regulating epidermal adhesion, growth and  
564 differentiation. *EMBO J* **21**, 3919-3926 (2002).
- 565
- 566 18. Matsumura H, *et al.* Hair follicle aging is driven by transepidermal elimination of  
567 stem cells via COL17A1 proteolysis. *Science* **351**, aad4395 (2016).
- 568
- 569 19. Morgner J, Ghatak S, Jakobi T, Dieterich C, Aumailley M, Wickstrom SA.  
570 Integrin-linked kinase regulates the niche of quiescent epidermal stem cells. *Nat*  
571 *Commun* **6**, 8198 (2015).
- 572
- 573 20. Rognoni E, *et al.* Kindlin-1 controls Wnt and TGF-beta availability to regulate  
574 cutaneous stem cell proliferation. *Nat Med* **20**, 350-359 (2014).
- 575
- 576 21. Tanimura S, *et al.* Hair follicle stem cells provide a functional niche for  
577 melanocyte stem cells. *Cell Stem Cell* **8**, 177-187 (2011).
- 578
- 579 22. Watanabe M, *et al.* Type XVII collagen coordinates proliferation in the  
580 interfollicular epidermis. *Elife* **6**, e26635 (2017).
- 581

- 582 23. Joost S, *et al.* Single-cell transcriptomics reveals that differentiation and spatial  
583 signatures shape epidermal and hair follicle heterogeneity. *Cell Syst* **3**, 221-237  
584 e229 (2016).  
585
- 586 24. Yurchenco PD. Basement membranes: cell scaffoldings and signaling platforms.  
587 *Cold Spring Harb Perspect Biol* **3**, a004911 (2011).  
588
- 589 25. Kiyozumi D, Takeichi M, Nakano I, Sato Y, Fukuda T, Sekiguchi K. Basement  
590 membrane assembly of the integrin alpha8beta1 ligand nephronectin requires  
591 Fraser syndrome-associated proteins. *The Journal of cell biology* **197**, 677-689  
592 (2012).  
593
- 594 26. Ryan MC, Lee K, Miyashita Y, Carter WG. Targeted disruption of the LAMA3  
595 gene in mice reveals abnormalities in survival and late stage differentiation of  
596 epithelial cells. *The Journal of cell biology* **145**, 1309-1323 (1999).  
597
- 598 27. Wegner J, *et al.* Laminin alpha5 in the keratinocyte basement membrane is  
599 required for epidermal-dermal intercommunication. *Matrix Biol* **56**, 24-41 (2016).  
600
- 601 28. Kolle G, Georgas K, Holmes GP, Little MH, Yamada T. CRIM1, a novel gene  
602 encoding a cysteine-rich repeat protein, is developmentally regulated and  
603 implicated in vertebrate CNS development and organogenesis. *Mech Dev* **90**, 181-  
604 193 (2000).  
605
- 606 29. Pennisi DJ, *et al.* Crim1KST264/KST264 mice display a disruption of the Crim1  
607 gene resulting in perinatal lethality with defects in multiple organ systems. *Dev*  
608 *Dyn* **236**, 502-511 (2007).  
609
- 610 30. Attur MG, *et al.* F-spondin, a neuroregulatory protein, is up-regulated in  
611 osteoarthritis and regulates cartilage metabolism via TGF-beta activation. *FASEB*  
612 *J* **23**, 79-89 (2009).  
613
- 614 31. Crawford SE, *et al.* Thrombospondin-1 is a major activator of TGF-beta1 in vivo.  
615 *Cell* **93**, 1159-1170 (1998).  
616
- 617 32. Day AJ, Milner CM. TSG-6: A multifunctional protein with anti-inflammatory

- 618 and tissue-protective properties. *Matrix Biol* **78-79**, 60-83 (2019).  
619
- 620 33. Oshimori N, Fuchs E. Paracrine TGF-beta signaling counterbalances BMP-  
621 mediated repression in hair follicle stem cell activation. *Cell Stem Cell* **10**, 63-75  
622 (2012).  
623
- 624 34. Chen D, Jarrell A, Guo C, Lang R, Atit R. Dermal beta-catenin activity in response  
625 to epidermal Wnt ligands is required for fibroblast proliferation and hair follicle  
626 initiation. *Development* **139**, 1522-1533 (2012).  
627
- 628 35. de Lau W, Peng WC, Gros P, Clevers H. The R-spondin/Lgr5/Rnf43 module:  
629 regulator of Wnt signal strength. *Genes Dev* **28**, 305-316 (2014).  
630
- 631 36. Sanes JR. The basement membrane/basal lamina of skeletal muscle. *J Biol Chem*  
632 **278**, 12601-12604 (2003).  
633
- 634 37. Sanes JR, Marshall LM, McMahan UJ. Reinnervation of muscle fiber basal  
635 lamina after removal of myofibers. Differentiation of regenerating axons at  
636 original synaptic sites. *The Journal of cell biology* **78**, 176-198 (1978).  
637
- 638 38. Ido H, *et al.* Laminin isoforms containing the gamma3 chain are unable to bind to  
639 integrins due to the absence of the glutamic acid residue conserved in the C-  
640 terminal regions of the gamma1 and gamma2 chains. *J Biol Chem* **283**, 28149-  
641 28157 (2008).  
642
- 643 39. Kikkawa Y, Sanzen N, Fujiwara H, Sonnenberg A, Sekiguchi K. Integrin binding  
644 specificity of laminin-10/11: laminin-10/11 are recognized by alpha 3 beta 1,  
645 alpha 6 beta 1 and alpha 6 beta 4 integrins. *J Cell Sci* **113 ( Pt 5)**, 869-876 (2000).  
646
- 647 40. Song HH, Shi W, Xiang YY, Filmus J. The loss of glypican-3 induces alterations  
648 in Wnt signaling. *J Biol Chem* **280**, 2116-2125 (2005).  
649
- 650 41. Kakugawa S, *et al.* Notum deacylates Wnt proteins to suppress signalling activity.  
651 *Nature* **519**, 187-192 (2015).  
652
- 653 42. Li J, *et al.* Laminin-10 is crucial for hair morphogenesis. *EMBO J* **22**, 2400-2410

- 654 (2003).  
655
- 656 43. Plikus MV, Chuong CM. Complex hair cycle domain patterns and regenerative  
657 hair waves in living rodents. *J Invest Dermatol* **128**, 1071-1080 (2008).  
658
- 659 44. Regev A, *et al.* The Human Cell Atlas. *Elife* **6**, e27041 (2017).  
660
- 661 45. Snyder MPL, S.; Posgai, A. *et al.* The human body at cellular resolution: the NIH  
662 Human Biomolecular Atlas Program. *Nature* **574**, 187–192 (2019).  
663
- 664 46. Tabula Muris C, *et al.* Single-cell transcriptomics of 20 mouse organs creates a  
665 Tabula Muris. *Nature* **562**, 367-372 (2018).  
666
- 667 47. Pastor-Pareja JC, Xu T. Shaping cells and organs in *Drosophila* by opposing roles  
668 of fat body-secreted Collagen IV and perlecan. *Dev Cell* **21**, 245-256 (2011).  
669
- 670 48. Naba A, Clauser KR, Lamar JM, Carr SA, Hynes RO. Extracellular matrix  
671 signatures of human mammary carcinoma identify novel metastasis promoters.  
672 *Elife* **3**, e01308 (2014).  
673
- 674 49. Schiller HB, *et al.* Time- and compartment-resolved proteome profiling of the  
675 extracellular niche in lung injury and repair. *Mol Syst Biol* **11**, 819 (2015).  
676
- 677 50. Nowak JA, Polak L, Pasolli HA, Fuchs E. Hair follicle stem cells are specified  
678 and function in early skin morphogenesis. *Cell Stem Cell* **3**, 33-43 (2008).  
679
- 680 51. Schweitzer R, Zelzer E, Volk T. Connecting muscles to tendons: tendons and  
681 musculoskeletal development in flies and vertebrates. *Development* **137**, 2807-  
682 2817 (2010).  
683
- 684 52. Rogers RS, Nishimune H. The role of laminins in the organization and function  
685 of neuromuscular junctions. *Matrix Biol* **57-58**, 86-105 (2017).  
686
- 687 53. Patton BL. Basal lamina and the organization of neuromuscular synapses. *J*  
688 *Neurocytol* **32**, 883-903 (2003).  
689

- 690 54. Sakai LY, Keene DR, Morris NP, Burgeson RE. Type VII collagen is a major  
691 structural component of anchoring fibrils. *The Journal of cell biology* **103**, 1577-  
692 1586 (1986).  
693
- 694 55. Suleiman H, *et al.* Nanoscale protein architecture of the kidney glomerular  
695 basement membrane. *Elife* **2**, e01149 (2013).  
696
- 697 56. Wetzels RH, Robben HC, Leigh IM, Schaafsma HE, Vooijs GP, Ramaekers FC.  
698 Distribution patterns of type VII collagen in normal and malignant human tissues.  
699 *Am J Pathol* **139**, 451-459 (1991).  
700
- 701 57. Yang H, Adam RC, Ge Y, Hua ZL, Fuchs E. Epithelial-mesenchymal micro-niches  
702 govern stem cell lineage choices. *Cell* **169**, 483-496 e413 (2017).  
703
- 704 58. Spence C, Simon-Assmann P, Orend G, Miner JH. Laminin alpha5 guides tissue  
705 patterning and organogenesis. *Cell Adh Migr* **7**, 90-100 (2013).  
706
- 707 59. DeRouen MC, Zhen H, Tan SH, Williams S, Marinkovich MP, Oro AE. Laminin-  
708 511 and integrin beta-1 in hair follicle development and basal cell carcinoma  
709 formation. *BMC Dev Biol* **10**, 112 (2010).  
710
- 711 60. Gao J, *et al.* Laminin-511 is an epithelial message promoting dermal papilla  
712 development and function during early hair morphogenesis. *Genes Dev* **22**, 2111-  
713 2124 (2008).  
714
- 715 61. Pouliot N, Saunders NA, Kaur P. Laminin 10/11: an alternative adhesive ligand  
716 for epidermal keratinocytes with a functional role in promoting proliferation and  
717 migration. *Exp Dermatol* **11**, 387-397 (2002).  
718
- 719 62. Nguyen NM, Kelley DG, Schlueter JA, Meyer MJ, Senior RM, Miner JH.  
720 Epithelial laminin alpha5 is necessary for distal epithelial cell maturation, VEGF  
721 production, and alveolization in the developing murine lung. *Dev Biol* **282**, 111-  
722 125 (2005).  
723
- 724 63. Hamilton TG, Klinghoffer RA, Corrin PD, Soriano P. Evolutionary divergence of  
725 platelet-derived growth factor alpha receptor signaling mechanisms. *Mol Cell Biol*

- 726           **23**, 4013-4025 (2003).  
727
- 728   64.    Ramirez A, *et al.* A keratin K5Cre transgenic line appropriate for tissue-specific  
729           or generalized Cre-mediated recombination. *Genesis* **39**, 52-57 (2004).  
730
- 731   65.    Abe T, *et al.* Establishment of conditional reporter mouse lines at ROSA26 locus  
732           for live cell imaging. *Genesis* **49**, 579-590 (2011).  
733
- 734   66.    Koike N, Kassai Y, Kouta Y, Miwa H, Konishi M, Itoh N. Brorin, a novel secreted  
735           bone morphogenetic protein antagonist, promotes neurogenesis in mouse neural  
736           precursor cells. *J Biol Chem* **282**, 15843-15850 (2007).  
737
- 738   67.    Smyth I, Scambler P. The genetics of Fraser syndrome and the blebs mouse  
739           mutants. *Hum Mol Genet* **14 Spec No. 2**, R269-274 (2005).  
740
- 741   68.    Tsutsui K, *et al.* ADAMTSL-6 is a novel extracellular matrix protein that binds to  
742           fibrillin-1 and promotes fibrillin-1 fibril formation. *J Biol Chem* **285**, 4870-4882  
743           (2010).  
744  
745

746 **Methods**

747 **Mice.** *Lgr6-GFP-ires-CreERT2*, *Gli1-eGFP*, *Cdh3-eGFP*, *Lama5* floxed, *Lama5*  
748 knockout mice have been described previously<sup>12, 62</sup>. *Lef1-eGFP* mice [STOCK Tg(Lef1-  
749 EGFP)IN75Gsat/Mmucd] were obtained from MMRRC. *Pdgfra-H2B-eGFP* mice  
750 (*Pdgfra*<sup>tm11(EGFP)Sor</sup>)<sup>63</sup>, K5-Cre mice<sup>64</sup> and R26-H2B-EGFP mice (CDB0238K)<sup>65</sup> were  
751 kindly provided by Dr Phillippe Soriano (Mount Sinai NY), Dr Jose Jorcano (CIEMAT-  
752 CIBERER, Madrid, Spain) and Dr Takaya Abe (RIKEN BDR), respectively. Mouse lines  
753 used for transcriptome analysis were backcrossed with C57BL/6N mice more than four  
754 times. R26-H2B-EGFP/*Lama5*<sup>-/-</sup> mice were crossed with C57BL/6 albino mice several  
755 times to avoid possible imaging interference from melanin deposition. For cell sorting  
756 and immunohistochemical analysis, wild-type C57BL/6N mice were used.

757

758 **FACS.** The epidermal cell isolation procedure was as described previously<sup>12</sup>. DP cells  
759 and pan-dermal fibroblasts were isolated from the dorsal skin of 8-week-old female mice.  
760 The epidermal tissue was removed from the dermal tissue by scraping after trypsinization.  
761 The remaining dermal tissue was minced and treated with 2 mg/ml collagenase type I  
762 (Gibco, MD, USA) at 37°C for 2 h with gentle mixing. Single-cell suspension was  
763 obtained by repeated gentle pipetting and passed through a 40 µm cell strainer (Falcon,  
764 NC, USA). To eliminate haematopoietic and endothelial cells (lineage-positive cells;  
765 Lin<sup>+</sup>), the cell suspension was stained with PE-Cy7-conjugated antibodies for CD45  
766 (eBioscience, CA, USA, 30-F11), TER-119 (eBioscience, TER119) and CD31  
767 (eBioscience, 390). To further distinguish the target cell populations from the remaining  
768 epidermal cells, the expression of CD49f (integrin α6) was examined using a PE-  
769 conjugated antibody (eBioscience, GoH3). For the further analysis of dermal cell

770 populations, the cell suspension was also stained with CD34-eFluor660 antibody  
771 (eBioscience, RAM34). Cell isolation procedures are shown in Fig. S1 a to g. To  
772 determine the DP cell population, mRNA expression levels of *Pdgfra*, *Itga8* and *eGFP*  
773 were examined by qRT-PCR (Fig. S1k, l). Cells were sorted with a FACS Aria II (BD  
774 Biosciences, CA, USA) according to the expression of reporter eGFP and cell surface  
775 markers, after gating out dead and Lin<sup>+</sup> cells. We prepared three or four independent  
776 biological replicates and used them for qRT-PCR and RNA-seq.

777

778 **qRT-PCR.** qRT-PCR was performed as described previously<sup>12</sup>. Primer sequences of the  
779 target genes are shown in Supplementary Table 5.

780

781 **RNA sequencing, mapping and expression quantification.** RNA sequencing and data  
782 processing were performed as described previously<sup>12</sup>. Briefly, 10 ng of total RNA samples  
783 extracted from FACS-isolated cells were subjected to library preparation using TruSeq  
784 Stranded mRNA Sample Prep Kit (Illumina) following the manufacturer's protocol with  
785 minor modification (shortened initial RNA fragmentation to 7 min). We generated three  
786 or four biologically independent cDNA libraries for each cell population. The prepared  
787 libraries were sequenced using the Rapid Run mode with 80 cycles on the HiSeq1500  
788 (Illumina) followed by trimming low-quality bases and removal of adaptor sequences.  
789 The processed reads were mapped to the mm10 mouse genome assembly using the  
790 TopHat v2.0.14 with default parameter settings. Gene expression quantification was  
791 performed using the Cuffdiff program in the Cufflinks package v2.2.1. Normalized  
792 FPKM gene expression values calculated by Cuffdiff were used for the following  
793 analyses. RNA sequencing and data processing described above were performed at the



794 Laboratory for Phyloinformatics, BDR, RIKEN. Expression data for epidermal  
795 populations used in this study were reported in our previous study and deposited in  
796 BioProject (PRJNA342736)<sup>12</sup>. RNA-seq data obtained in this study have been submitted  
797 to the Sequence Read Archive (SRA) as BioProject: PRJDB9477. RNA-seq read and  
798 mapping statistics for the analysed libraries are summarized in Supplementary Table 6.

799

800 **Gene expression analysis.** To understand the expression patterns of ECM genes, we first  
801 compiled a list of ECM genes from the literature<sup>9, 12, 66, 67, 68</sup>, and then defined 281 genes  
802 as our matrisome ECM genes (Table S2). To compare gene expression levels among the  
803 sorted cell compartments, log<sub>2</sub>-transformed FPKM values from RNA-seq data were used.  
804 For further analysis, genes with low expression (FPKM of less than 3 in all regions) were  
805 filtered out and not used. Charts of hierarchical clustering, expression correlation and  
806 principal component analysis (PCA) were plotted using Bioconductor R (ver. 3.5.3). For  
807 hierarchical clustering, similarity was calculated using the hclust function with Euclidean  
808 distance and the complete linkage clustering method. The obtained data were further  
809 analysed using the prcomp function for PCA. For gene expression correlation, the cor  
810 function with the Spearman method was used. Each ECM gene expression was visualized  
811 using the heatmap.2 function.

812 To elucidate the regional expression of ECM genes, expression levels (average  
813 FPKM among replicates) were binarized by setting a threshold (40% value of average  
814 FPKM of the epidermal or dermal cell populations that exhibit the highest expression  
815 level). Expression values of FPKM less than 3 were always considered to reflect no  
816 expression. Then, expressed ECM genes were mapped in a Venn diagram as pie charts,  
817 in which the pie size represents the expression levels of the gene. Pie chart graphs were

818 generated using Cytoscape (ver. 3.4.0 with Java 1.8.0).

819 For Gene Ontology analysis, ECM gene sets were subjected to a statistical  
820 overrepresentation test on the PANTHER website (ver. 14.1). Enriched biological process  
821 terms (over 40-fold enrichment) were evaluated for their *p*-value and FDR.

822

823 **Antibody production.** To obtain specific antibody against CRIM1 protein, a Japanese  
824 White rabbit was immunized with the recombinant extracellular region of Crim1 protein  
825 and raised serum was collected. In detail, a cDNA fragment encoding the extracellular  
826 region of mouse *Crim1* (Leu<sup>35</sup>–Asp<sup>939</sup>) was amplified using cDNA derived from E16.5  
827 mouse embryos with the following restriction enzyme site-tagged primer set: forward,  
828 GCGGCCAGCCGGCCCTGGTCTGCCTGCCCTGTG, and reverse,  
829 CTCCTCGAGAGAGTCCAGTGATGAGTCTTC. Amplified cDNA was subcloned into  
830 the Sfi I-Xho I site of pSecTag2A mammalian expression vector (Invitrogen). The CRIM1  
831 extracellular region was transiently expressed and secreted by 293F cells using  
832 ExpiFectamine 293 (Gibco), and purified with a Ni-Sepharose 6 FF column (GE  
833 Healthcare, Little Chalfont, UK), following the manufacturer's protocol. Rabbits were  
834 immunized with the purified protein and high-titre serum was obtained (T.K. Craft Corp.,  
835 Gunma, Japan). Antibody specificity was confirmed by immunostaining using mouse  
836 embryonic skin.

837 Rabbit antiserum to mouse laminin  $\alpha$ 5 was generated by immunizing rabbits  
838 with GST-fused I and II domains of laminin  $\alpha$ 5 (Lys<sup>2220</sup>–Leu<sup>2459</sup>). The I and II domains  
839 were amplified using cDNA derived from E16.5 mouse embryos with the following  
840 restriction enzyme site-tagged primer set: forward,  
841 CGGGATCCCGTAAACTCCGGAGCCCACCGGGAC, and reverse,

842 GGAATTCCTACTTGTTCATCGTCGTCCTTGTAATCCAGGTGCTCTAGGTCCTCC  
843 TTAG. Amplified cDNA was subcloned into the EcoR I site of the pGEX-6P-1 expression  
844 vector (GE Healthcare). The antigen was expressed in BL21 and purified with a  
845 Glutathione Sepharose 4B column (GE Healthcare), following the manufacturer's  
846 protocol. The antibody in the antiserum was affinity-purified with antigen-conjugated  
847 CNBr-activated Sepharose 4B. The specificity of the antibody to mouse laminin  $\alpha$ 5 chain  
848 was confirmed by the absence of antibody immunoreactivity to tissue samples from mice  
849 with *Lama5* conditional knockout.

850

851 **Antibodies.** Details of the antibodies used in this study are summarized in Supplementary  
852 Table 7.

853

854 **Immunohistochemistry and imaging.** Whole-mount immunostaining of mouse dorsal  
855 skin was performed as described previously<sup>15</sup>. Briefly, mouse skin tissues were dissected  
856 and fixed with 4% paraformaldehyde (PFA)/PBS for 1 h at 4°C, and embedded in OCT  
857 compound after washing with PBS. For acetone fixation, dissected skin was directly  
858 embedded in OCT compound. Skin sections (150  $\mu$ m thick) were made using a cryostat  
859 (Leica, Wetzlar, Germany) and washed with PBS. Acetone fixation was performed by  
860 placing skin sections in -30°C acetone for 15 min, followed by acid treatment with 0.1 N  
861 HCl/0.1 N KCl for 15 min after washing in PBS. Skin sections were blocked with a  
862 blocking buffer (0.5% skim milk/0.25% fish skin gelatin/0.5% Triton X-100/PBS) for 1  
863 h at 4°C, and then incubated with primary antibodies diluted in blocking buffer overnight  
864 at 4°C. Skin samples were washed with 0.2% Tween 20/PBS for 4 h and then incubated  
865 with secondary antibodies similarly to the primary antibodies. After that, skin samples

866 were stained with DAPI, washed with 0.2% Tween 20/PBS for 4 h at 4°C, and mounted  
867 with BABB clearing solution. Images were acquired using Leica TSC SP8. Three-  
868 dimensional reconstructed images were produced using Imaris software (Bitplane,  
869 Oxford, UK).

870

871 **Transmission electron microscopy.** Mouse dorsal skin tissues were dissected into 2–3  
872 mm squares and immersed in fixation solution (2% paraformaldehyde/2%  
873 glutaraldehyde/0.1 M phosphate buffer). The following steps were performed by  
874 Hanaichi Ultrastructure Research Institute (Okazaki, Japan). After washing with 0.1 M  
875 phosphate buffer, samples were post-fixed with 2% osmium tetroxide followed by step-  
876 dehydration with gradual substitution in higher-concentration ethanol (30%, 50%, 70%,  
877 90% and 100%) and finally 100% propylene oxide. Then, the samples were embedded in  
878 epoxy resin Epon812. Ultra-thin sections were cut, stained with uranyl acetate and lead  
879 citrate solution, and viewed with a JEM-1200EX (JEOL, Tokyo, Japan) transmission  
880 electron microscope at an accelerating voltage of 80 kV.

881

882 **Image quantification.** All quantification analyses were performed using Fiji software  
883 (ver. 2.0.0-rc-69). To calculate ECM protein intensities in the different BM regions, six  
884 epidermal regions [interfollicular epidermis (IFE), lower isthmus, upper bulge, mid-bulge,  
885 lateral HG and interface region between HG and DP] were specified from HF morphology  
886 and their representative immunohistochemical patterns. The target BM regions were  
887 manually drawn in the colour split image, and their mean intensities were measured.  
888 Relative intensities were calculated as percentile values where the maximum-intensity  
889 region was 100. The data were represented as a heatmap chart by Bioconductor R and

890 radar charts by Excel (Microsoft corp., WA, USA). To quantify hemidesmosome-like  
891 structures and cellular protrusions, cellular perimeters facing the BM region or space of  
892 interest were measured by tracing freehand with a pen on the scale-set images. The  
893 lengths were used for calculation of the frequencies of appearance of hemidesmosome-  
894 like structures and cellular protrusions. Segmentation of the cellular fraction was  
895 manually performed using Fiji software. To quantify dorsal pigmented areas, binarized  
896 ROI images were first generated from the individual photos using Fiji software. Image-  
897 specific thresholds were determined manually between pigmented and non-pigmented  
898 areas from 8-bit greyscale images. Pixels corresponding to the pigmented area were  
899 counted using Fiji. A box plot graph was created using Bioconductor R.

900

901 **Statistical analysis.** Statistical parameters including the numbers of samples and  
902 replicates, types of statistical analysis and statistical significance are indicated in the  
903 Results, Figures and Figure Legends. \* $p < 0.05$ ; \*\* $p < 0.01$ ; \*\*\* $p < 0.001$ .
